# Supplementary material for: High-Throughput, Temporal and Dose Dependent, Effect of Vitamins and Minerals on Chondrogenesis
Source: PubMed Central journal article supplement (PMC7053227; doi:10.3389/fcell.2020.00092), 2020-02-25

## Supplemental Data

The following table shows the presence or absence of the 14 vitamins or minerals (highlighted in yellow) which were determined to be absent in DMEM.

**Supplemental Table 1 – Common media compositions**

| Medium                                                                  | DMEM    | RPMI-1640 | Ham's F12 | IMDM     |
|-------------------------------------------------------------------------|---------|-----------|-----------|----------|
| Catalog number                                                          | D5796   | R8758     | 51651C    | I2762    |
| Component (g/L)                                                         |         |           |           |          |
| <b>Inorganic Salts</b>                                                  |         |           |           |          |
| Calcium Chloride                                                        | 0.2     |           | 0.03322   | 0.219    |
| Calcium nitrate Ca(NO <sub>3</sub> ) <sub>2</sub> •4H <sub>2</sub> O    |         | 0.1       |           |          |
| <b>Chromium</b>                                                         |         |           |           |          |
| <b>Cobalt</b> (*present due to Vitamin B12)                             |         |           | *         | *        |
| <b>Copper</b> Sulphate CuSO <sub>4</sub> • 9H <sub>2</sub> O            |         |           | 0.0000025 |          |
| Ferric Nitrate • 9H <sub>2</sub> O                                      | 0.0001  |           | 0.000834  |          |
| <b>Iodine</b>                                                           |         |           |           |          |
| <b>Manganese</b>                                                        |         |           |           |          |
| Magnesium Sulfate (anhydrous)                                           | 0.09767 | 0.04884   |           | 0.09767  |
| Magnesium Chloride MgCl <sub>2</sub>                                    |         |           | 0.05722   |          |
| <b>Molybdenum</b>                                                       |         |           |           |          |
| Potassium Chloride                                                      | 0.4     | 0.4       | 0.224     | 0.33     |
| Potassium Nitrate KNO <sub>3</sub>                                      |         |           |           | 0.000076 |
| Sodium Bicarbonate NaHCO <sub>3</sub>                                   | 3.7     | 2         | 1.176     | 3.024    |
| Sodium Chloride                                                         | 6.4     | 6         | 7.599     | 4.505    |
| Sodium Phosphate dibasic (anhydrous) Na <sub>2</sub> HPO <sub>4</sub>   |         | 0.8       | 0.14204   |          |
| Sodium Phosphate Monobasic (anhydrous) NaH <sub>2</sub> PO <sub>4</sub> | 0.109   |           |           | 0.109    |
| Sodium Selenite Na <sub>2</sub> SeO <sub>3</sub>                        |         |           |           | 0.000017 |
| <b>Zinc</b> ZnSO <sub>4</sub> • 7H <sub>2</sub> O                       |         |           | 0.000863  |          |
| <b>Amino Acids</b>                                                      |         |           |           |          |
| L-Alanine                                                               |         |           | 0.009     | 0.025    |
| L-Arginine • HCl                                                        | 0.084   | 0.2       | 0.211     | 0.084    |
| L-Asparagine (Anhydrous)                                                |         | 0.05      |           | 0.0284   |
| L-Asparagine • H <sub>2</sub> O                                         |         |           | 0.01501   |          |
| L-Aspartic Acid                                                         |         | 0.02      | 0.0133    | 0.03     |
| L-Cystine • 2HCl                                                        | 0.0626  | 0.0652    |           | 0.09124  |
| L-Cystine • HCl • H <sub>2</sub> O                                      |         |           | 0.035     |          |
| L-Glutamic Acid                                                         |         | 0.02      | 0.0147    | 0.075    |
| L-Glutamine                                                             | 0.584   | 0.3       | 0.146     |          |
| Glycine                                                                 | 0.03    | 0.01      | 0.00751   | 0.03     |
| L-Histidine (free base)                                                 |         | 0.015     |           |          |
| L-Histidine • HCl • H <sub>2</sub> O                                    | 0.042   |           | 0.02096   | 0.042    |
| L-Isoleucine                                                            | 0.105   | 0.05      | 0.00394   | 0.105    |
| L-Leucine                                                               | 0.105   | 0.05      | 0.0131    | 0.105    |
| L-Lysine • HCl                                                          | 0.146   | 0.04      | 0.0365    | 0.146    |
| L-Methionine                                                            | 0.03    | 0.015     | 0.00448   | 0.03     |
| L-Phenylalanine                                                         | 0.066   | 0.015     | 0.00496   | 0.066    |

|                                             |         |          |           |          |
|---------------------------------------------|---------|----------|-----------|----------|
| L-Proline                                   |         | 0.02     | 0.0345    | 0.04     |
| L-Serine                                    | 0.042   | 0.03     | 0.0105    | 0.042    |
| L-Threonine                                 | 0.095   | 0.02     | 0.0119    | 0.095    |
| L-Tryptophan                                | 0.016   | 0.005    | 0.0024    | 0.016    |
| L-Tyrosine • 2Na • 2H <sub>2</sub> O        | 0.10379 | 0.02883  | 0.00778   | 0.10379  |
| L-Valine                                    | 0.094   | 0.02     | 0.0117    | 0.094    |
| <b>Vitamins</b>                             |         |          |           |          |
| Choline Chloride                            | 0.004   | 0.003    | 0.01396   | 0.004    |
| <i>myo</i> -Inositol                        | 0.0072  | 0.035    | 0.018     | 0.0072   |
| <b>Vitamin A</b>                            |         |          |           |          |
| Vitamin B1 Thiamine • HCl                   | 0.004   | 0.001    | 0.000034  | 0.004    |
| Vitamin B2 Riboflavin                       | 0.0004  | 0.0002   | 0.000038  | 0.0004   |
| Vitamin B3 Niacinamide                      | 0.004   | 0.001    | 0.0000367 | 0.004    |
| Vitamin B5 D-Pantothenic Acid (hemicalcium) | 0.004   | 0.00025  | 0.000238  | 0.004    |
| Vitmain B6 Pyridoxal • HCl                  | —       |          |           | 0.004    |
| Vitamin B6 Pyridoxine • HCl                 | 0.00404 | 0.001    | 0.000062  |          |
| <b>Vitamin B7</b> D-Biotin                  |         | 0.0002   | 0.0000073 | 0.000013 |
| Vitamin B9 Folic Acid                       | 0.004   | 0.001    | 0.0013    | 0.004    |
| <b>Vitamin B12</b>                          |         | 0.000005 | 0.00136   | 0.000013 |
| <b>Vitamin D</b>                            |         |          |           |          |
| <b>Vitamin E</b>                            |         |          |           |          |
| <b>Vitamin K</b>                            |         |          |           |          |
| <b>Other</b>                                |         |          |           |          |
| p-Amino Benzoic Acid                        |         | 0.001    |           |          |
| D-Glucose                                   | 4.5     | 2        | 1.802     | 4.5      |
| Glutathione (reduced)                       |         | 0.001    |           |          |
| HEPES                                       |         |          |           | 5.958    |
| Hypoxanthine sodium salt                    |         |          | 0.00477   |          |
| Linoleic Acid                               |         |          | 0.000084  |          |
| <b>α-linolenic acid</b>                     |         |          |           |          |
| Phenol Red • Na                             | 0.0159  | 0.0053   | 0.0013    | 0.016    |
| Pyruvic Acid • Na                           |         |          | 0.11      | 0.11     |
| Putrescine • 2H <sub>2</sub> O              |         |          | 0.000161  |          |
| Thioctic Acid                               |         |          | 0.00021   |          |
| Thymidine                                   |         |          | 0.00073   |          |
| <b>Add</b>                                  |         |          |           |          |
| L-Glutamine                                 |         |          |           | 0.584    |

Supplemental Data 1

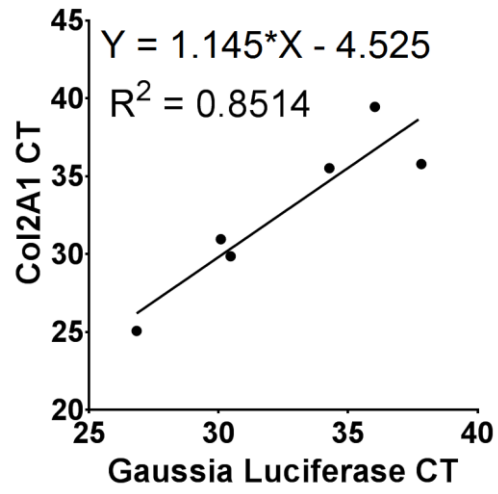

Correlation of *COL2A1* promoter-driven *Gaussia Luciferase* expression with type II collagen expression

## Supplemental Data 2

The following graphs all show *COL2A1* promoter-driven expression, assessed by luminescence, at 4 time points following continuous stimulation with vitamins or minerals over a 5 log dose response ( $n \geq 3 \pm$  S.D., \* > control, basal medium, \* < control, basal medium; 2-way ANOVA with Sidak's multiple comparison test, Alpha 0.05). In all comparisons both day and dose were significant sources of variation with significant interaction between them ( $p < 0.0001$ ).

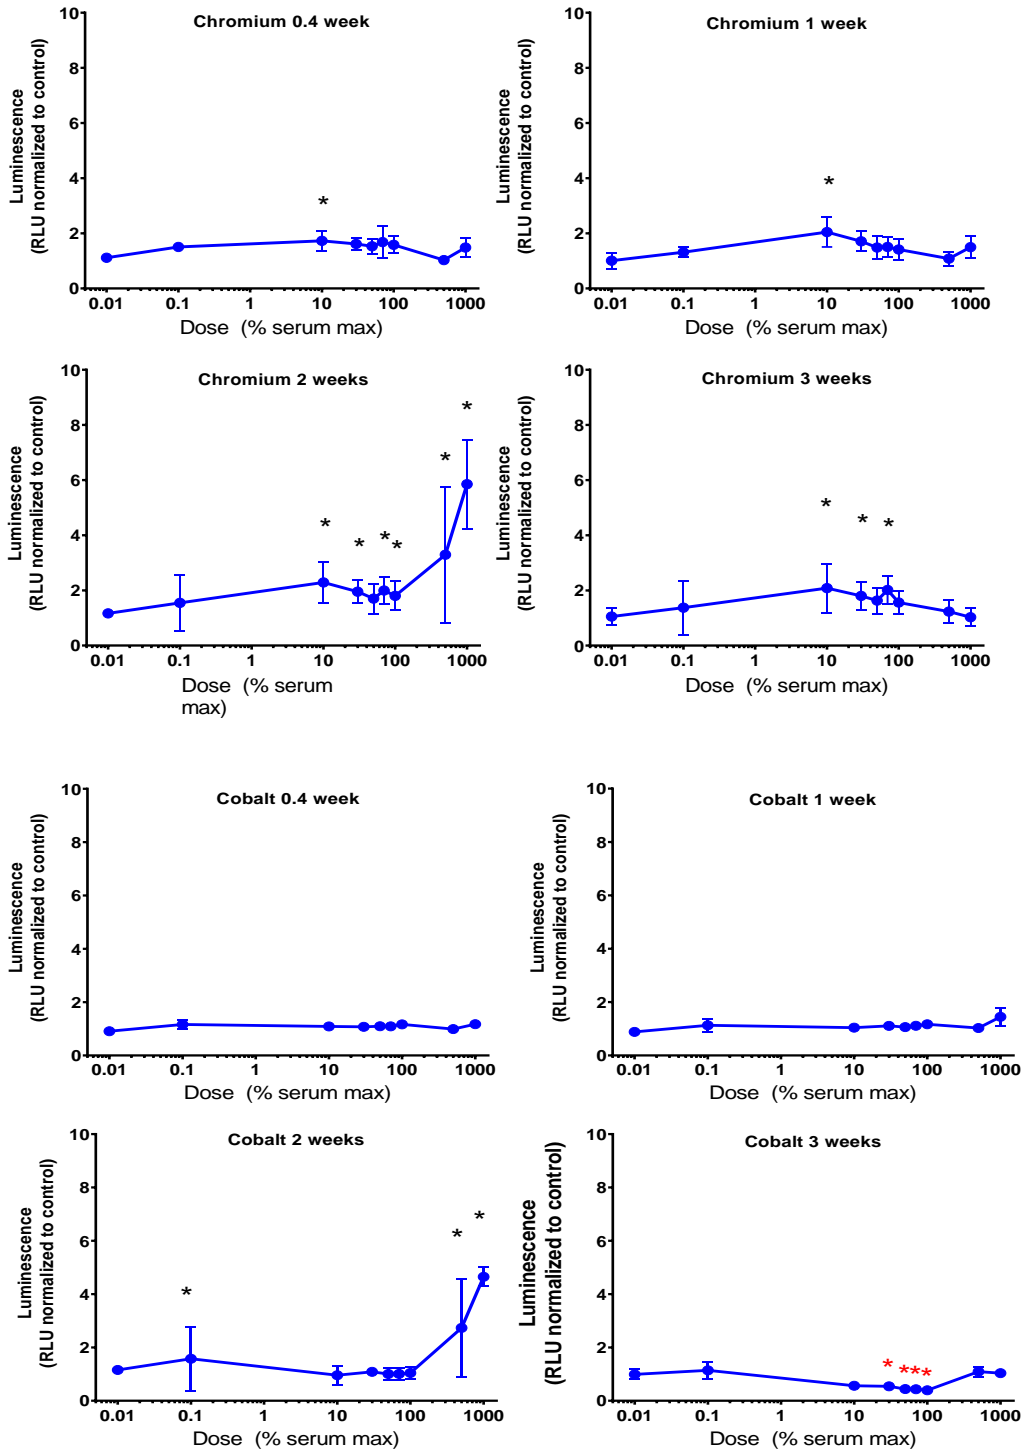

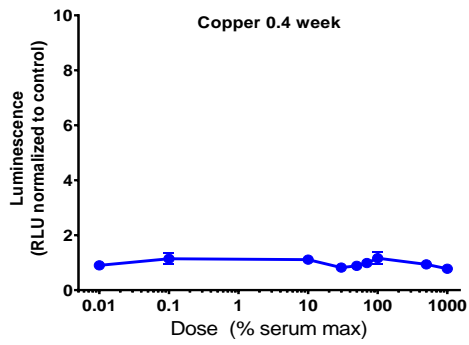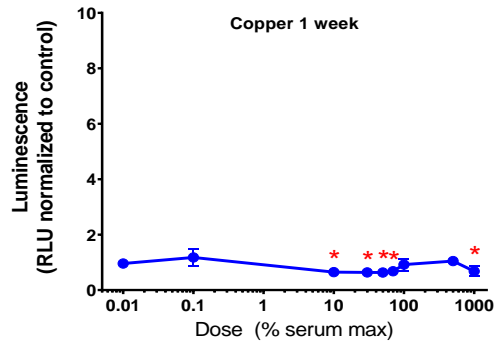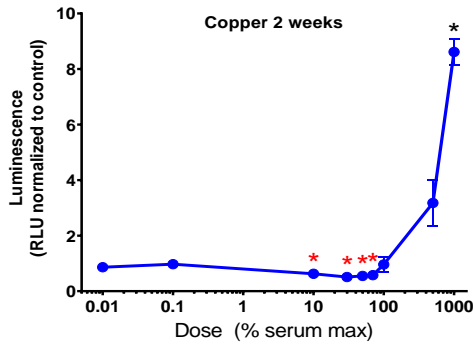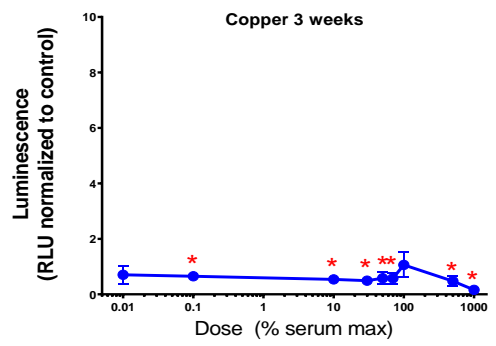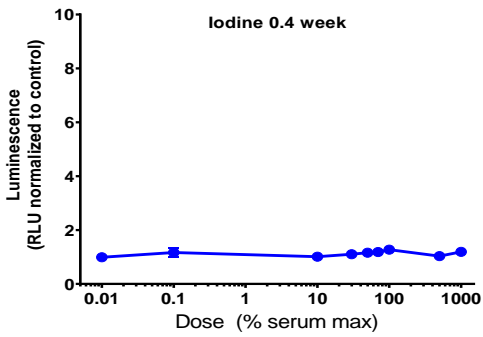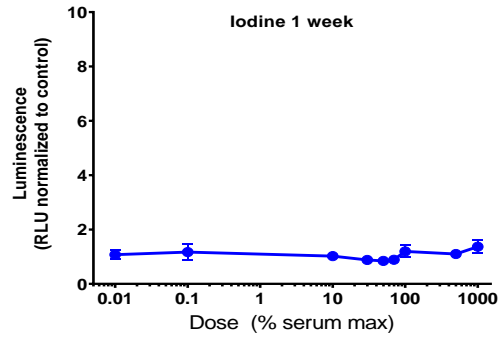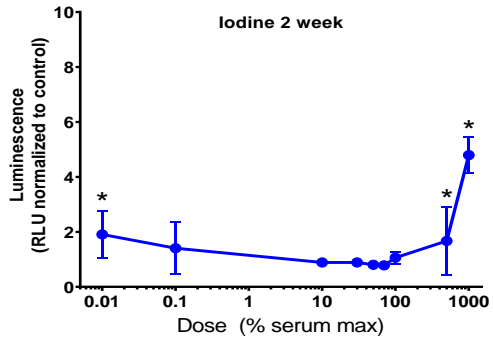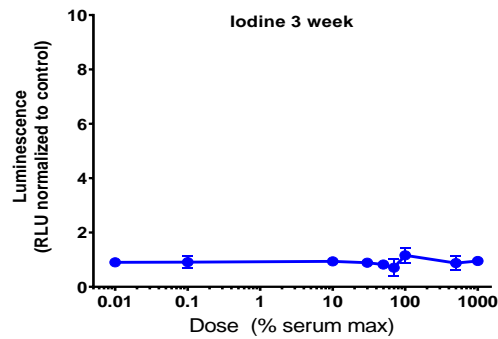

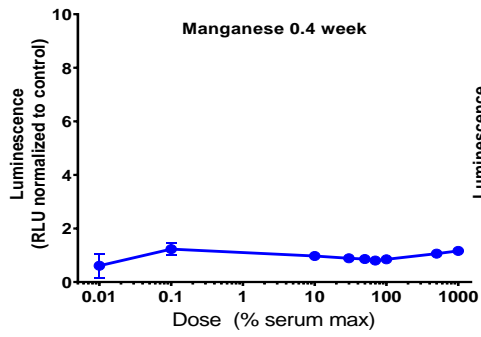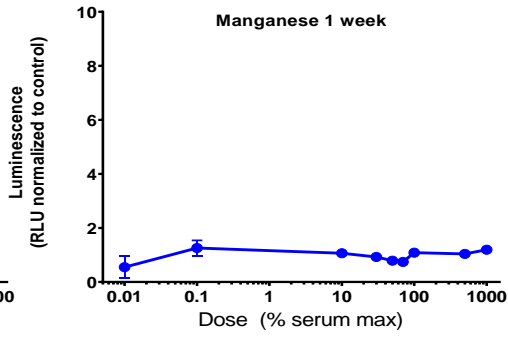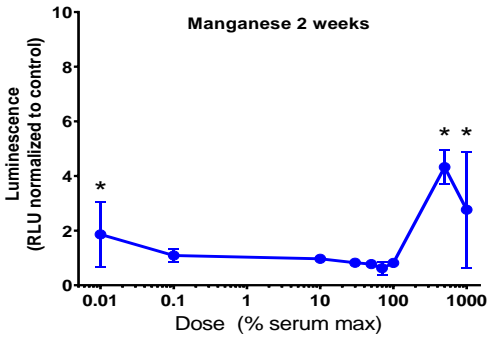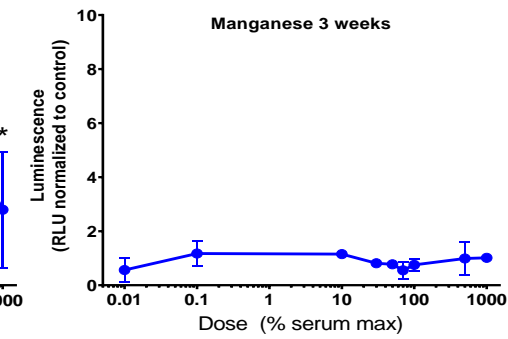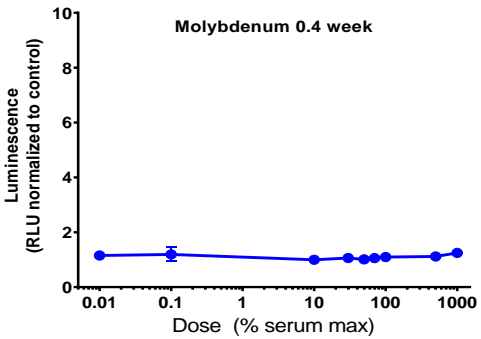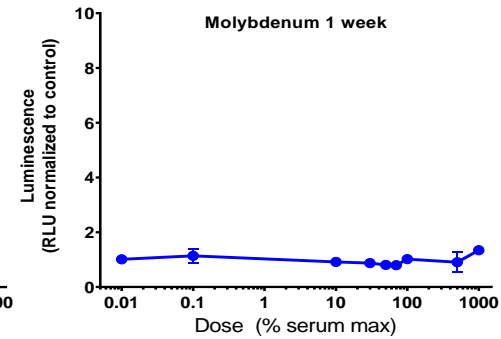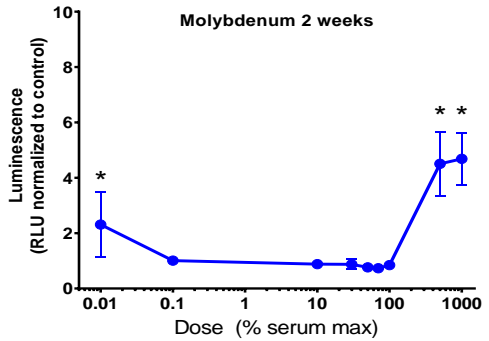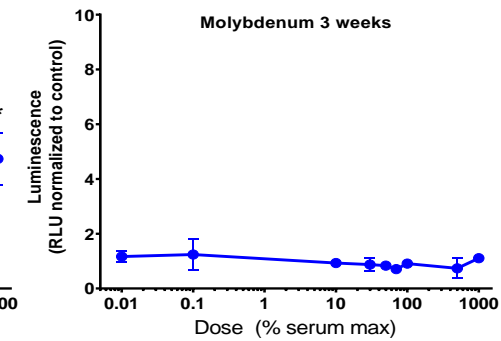

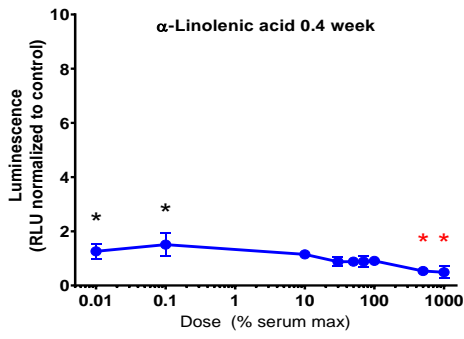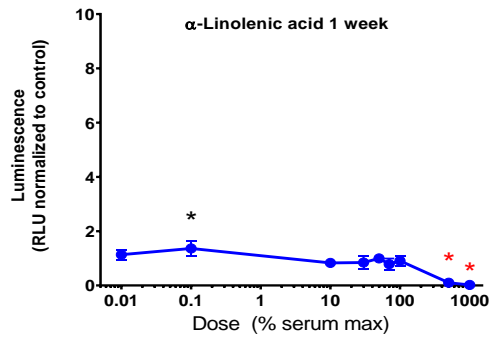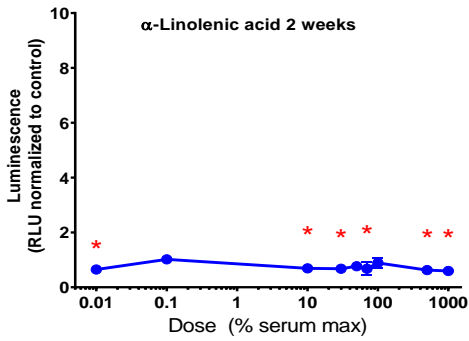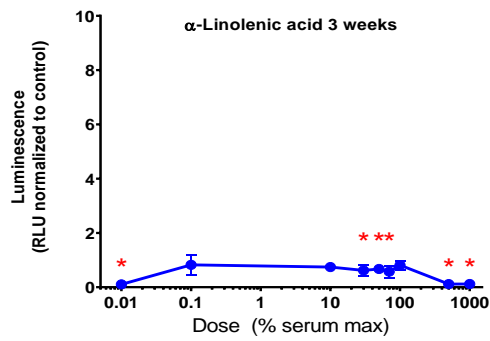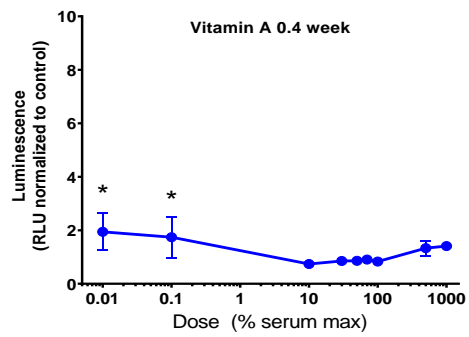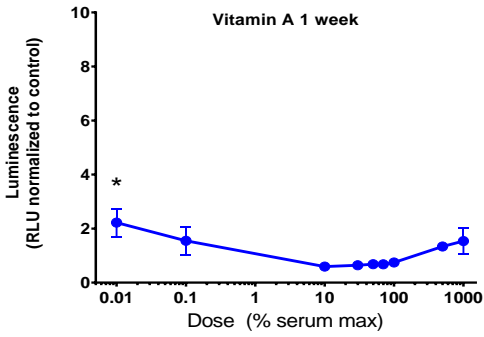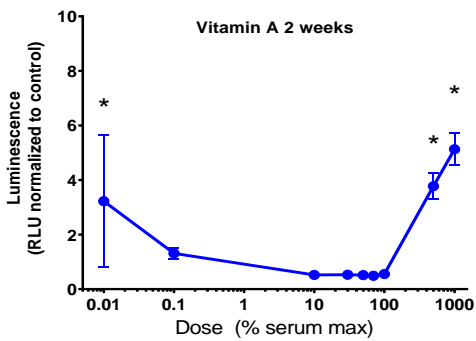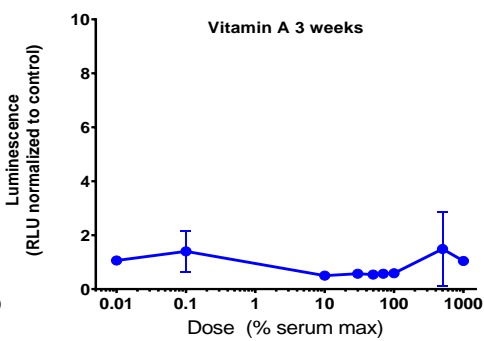

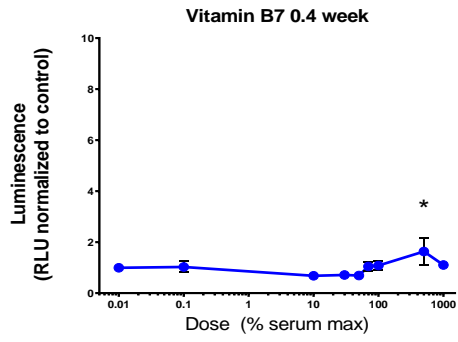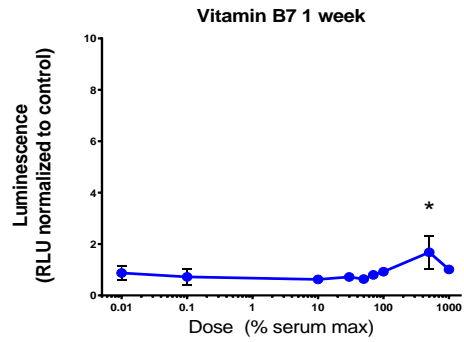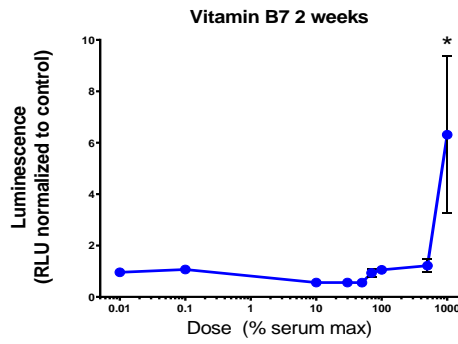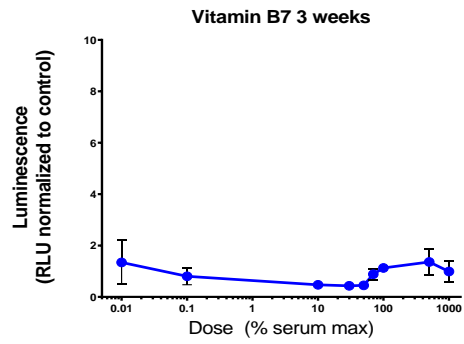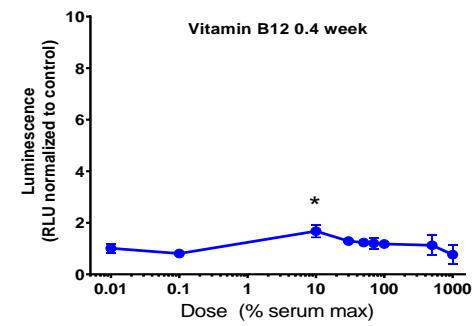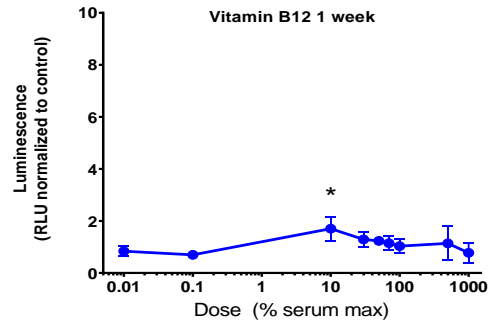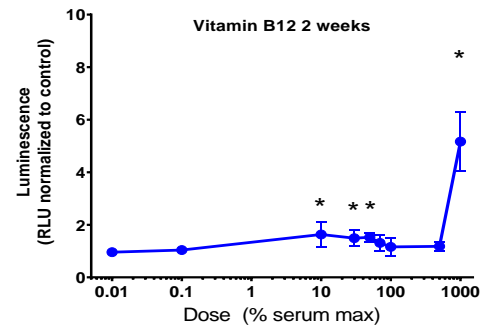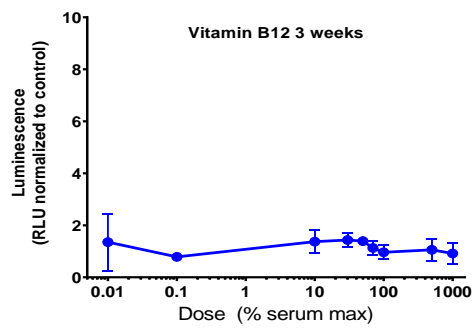



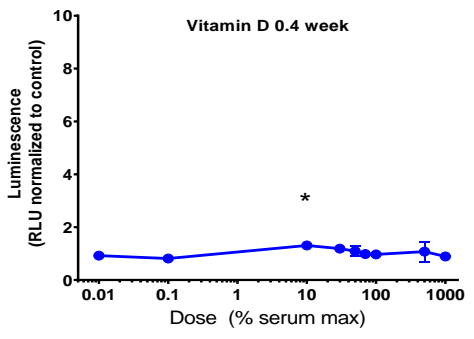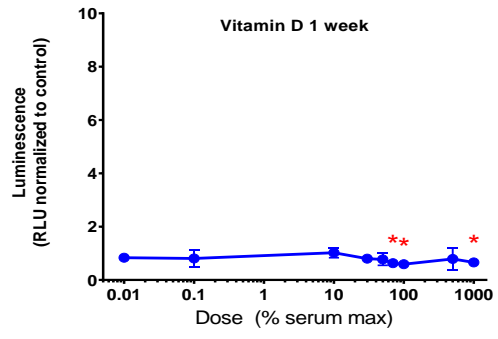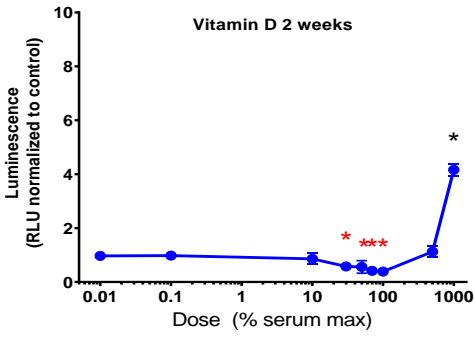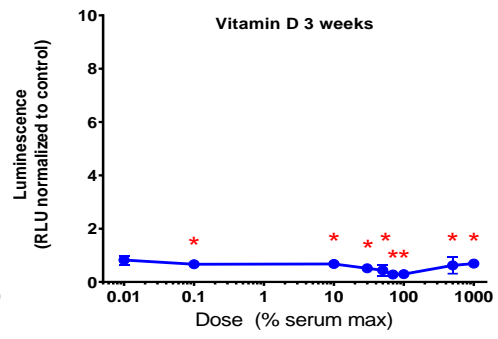

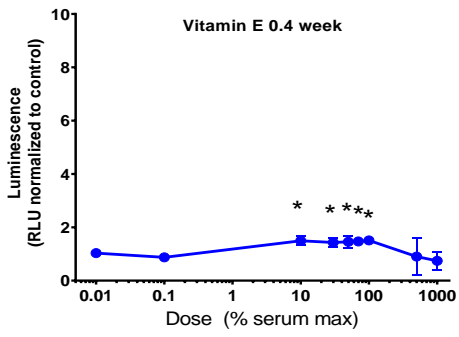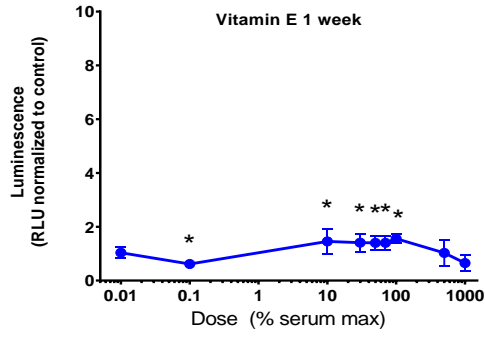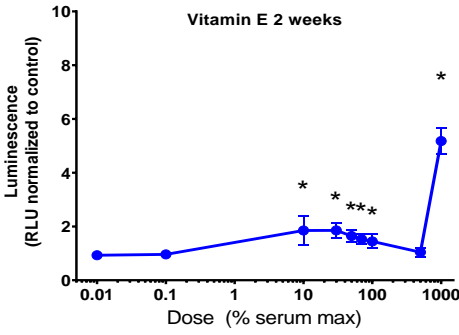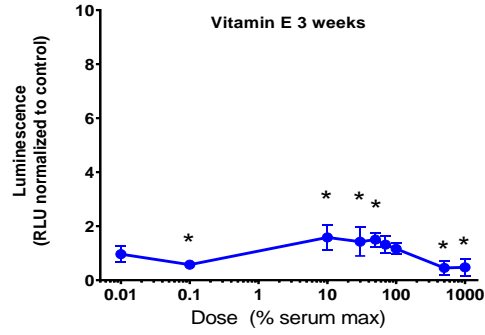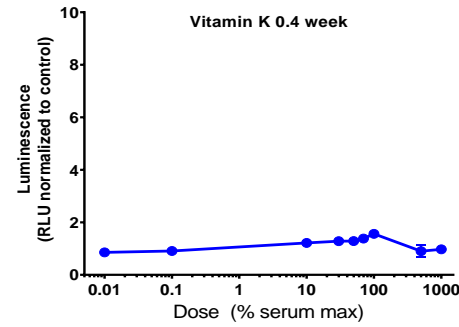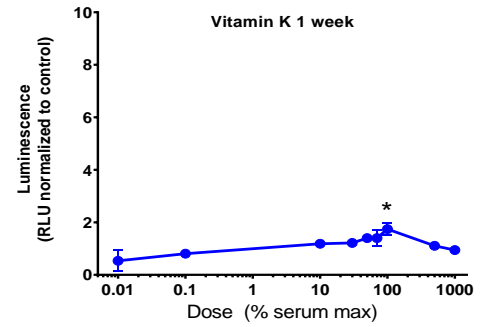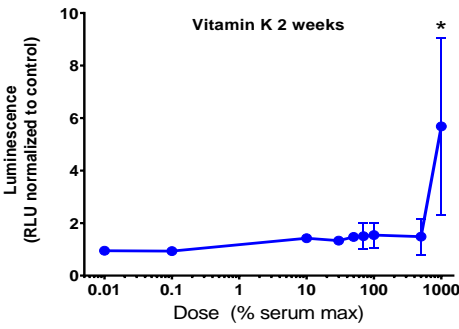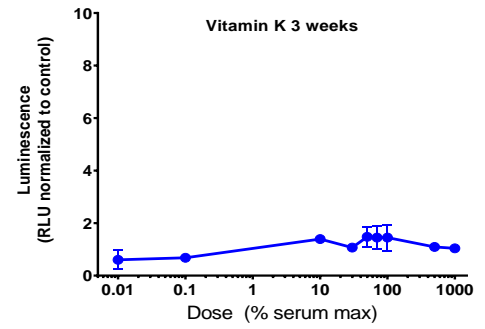

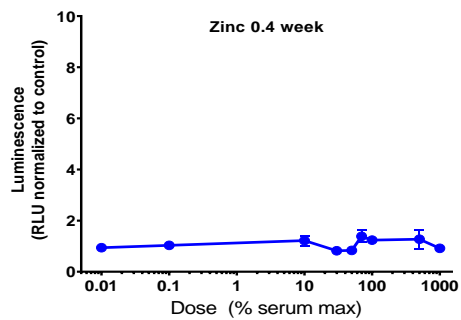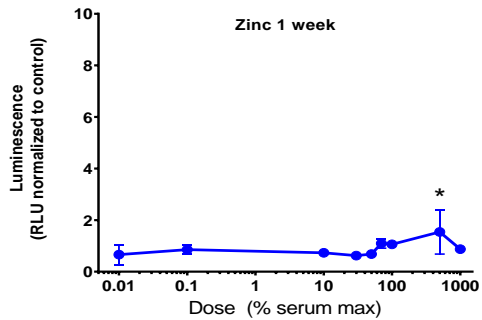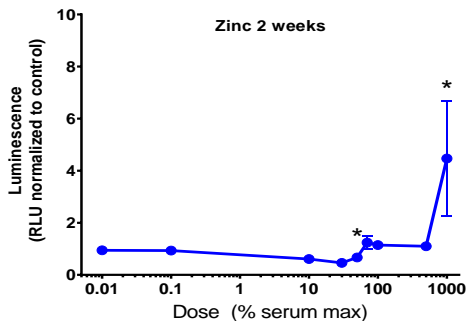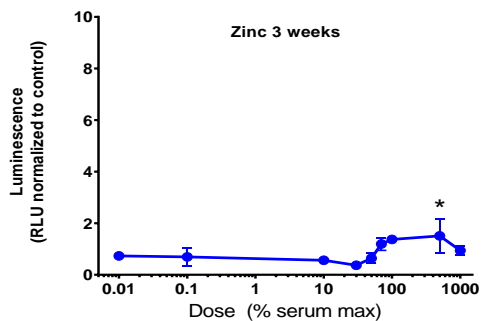



## Supplemental Data 4

The following graphs show the results of addition of vitamins B12, E, and chromium to previously defined supplemented media over a three-week period on *COL2A1* promoter-driven expression. Media were normalized against basal control medium with no TGFβ1 and compared to each supplemented media by two-way ANOVA with Sidak's multiple comparison test, Alpha 0.05. Each supplemented media average is represented by a red dashed line. Conditions that were statistically greater than their respective supplemented medium are represented by a ▲ and an \*; conditions that were similar to their respective supplemented medium are represented by a ●; conditions that were lower than their respective supplemented medium are represented by ▼. There was significant interaction between the supplemented media and the additional factors, both of which were also significant sources of variation.

0.4 week

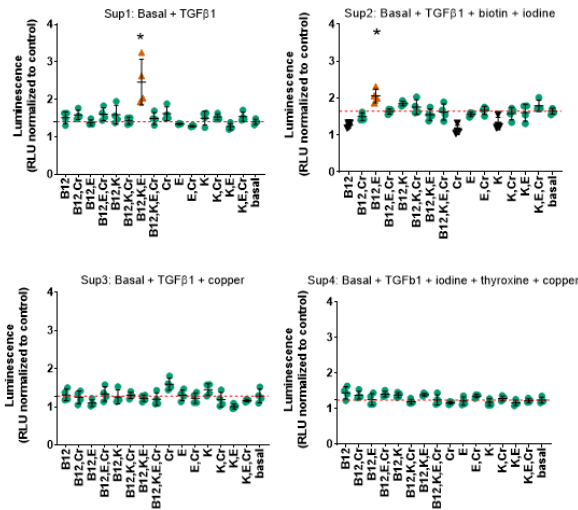

1 week

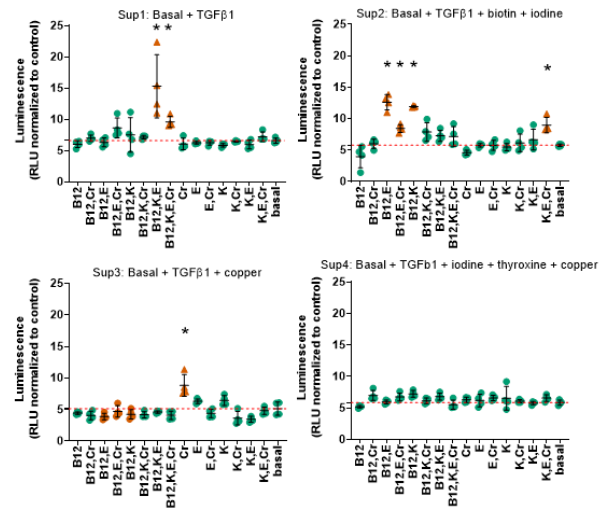

2 weeks

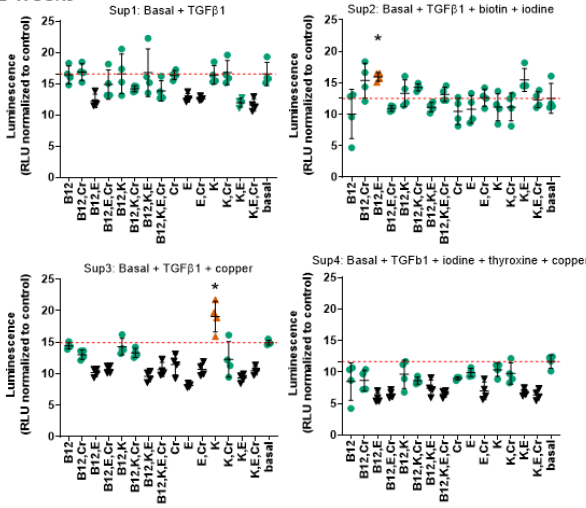

3 weeks

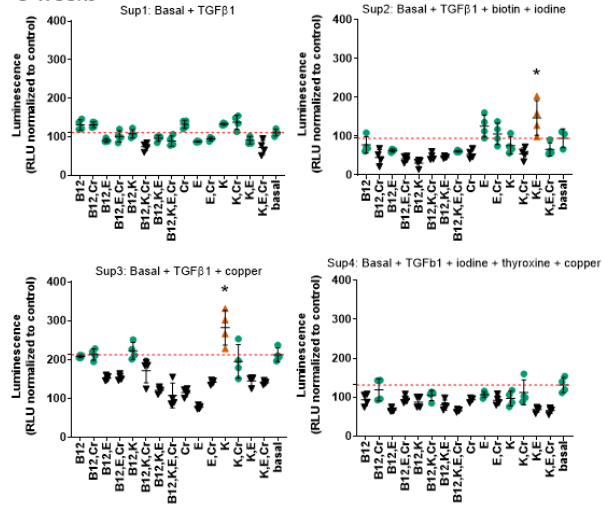

### Supplemental Data 5

The following graphs all show *COL2A1* promoter-driven expression, assessed by luminescence, at 4 time points following continuous stimulation with vitamins or minerals in the presence of TGF $\beta$ 1 (1ng/ml) over a 5 log dose response. Conditions that were statistically greater than TGF $\beta$ 1 supplemented medium are represented by a  $\blacktriangle$  and an \*; conditions that were similar to TGF $\beta$ 1 supplemented medium are represented by a  $\bullet$ ; conditions that were lower than TGF $\beta$ 1 supplemented medium are represented by  $\blacktriangledown$ ; 2-way ANOVA with Sidak's multiple comparison test, Alpha 0.05. A red dashed line indicates the mean TGF $\beta$ 1 supplemented medium response. In most comparisons both time and dose were significant sources of variation with significant interaction between them, where this was not the case details are noted below the set of graphs.

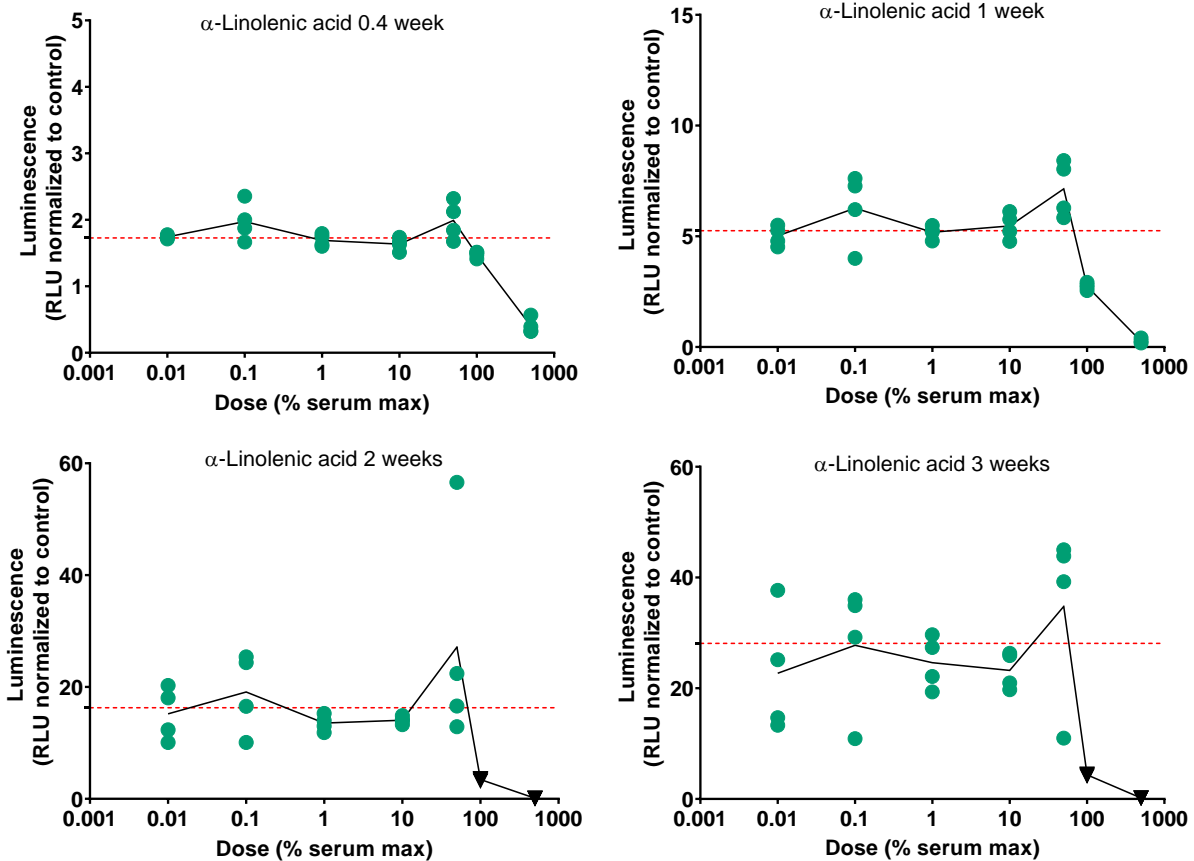

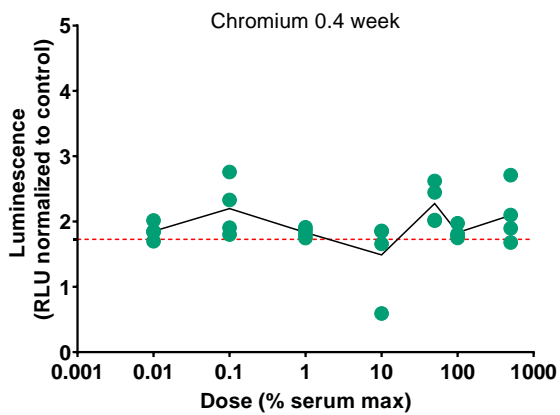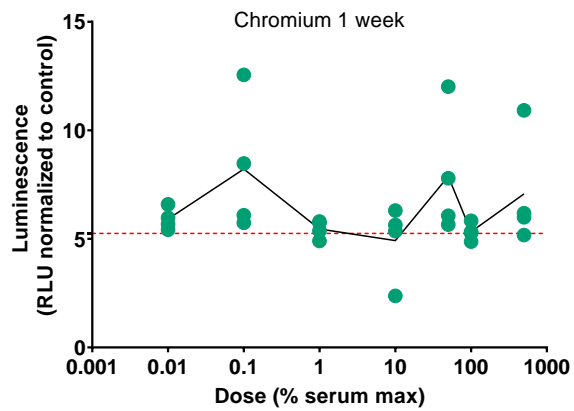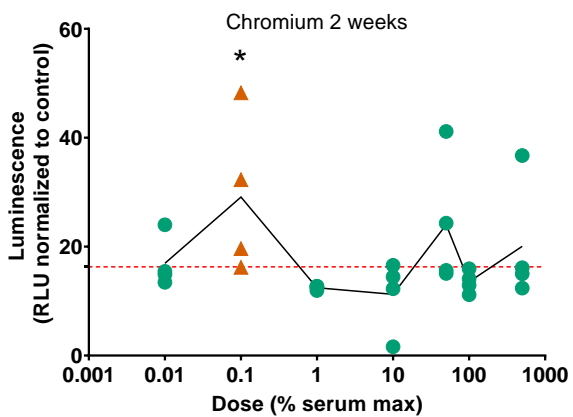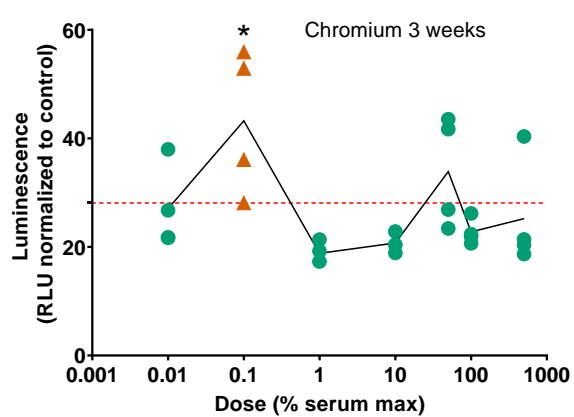

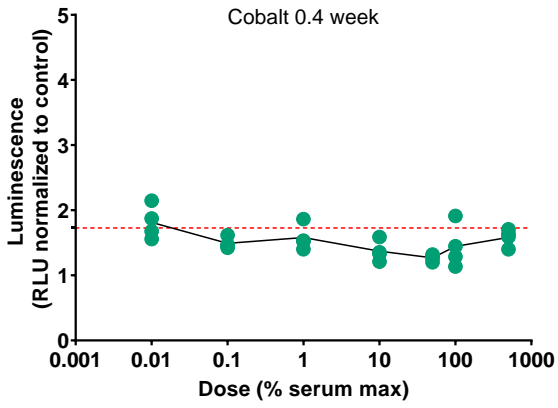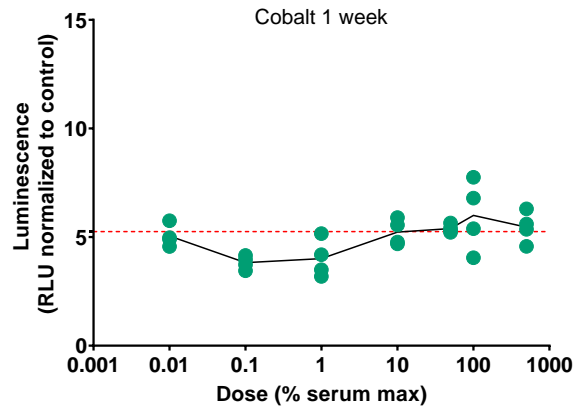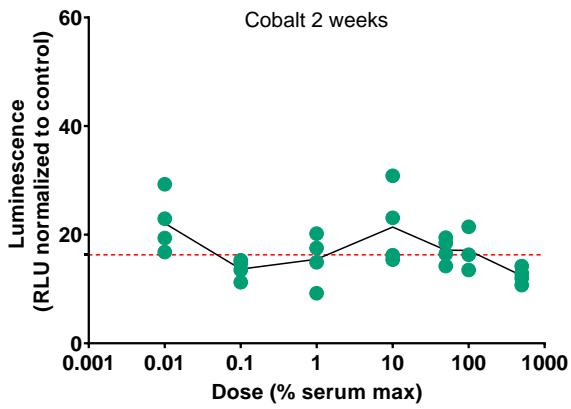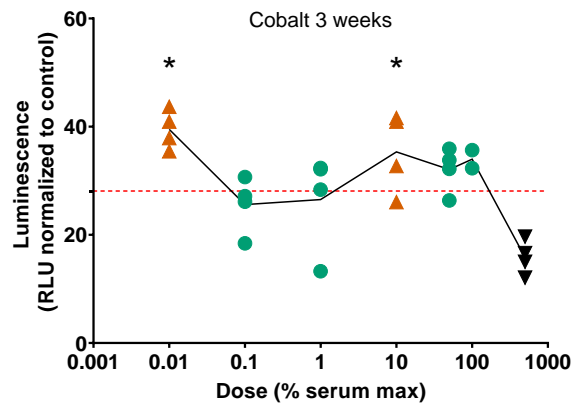



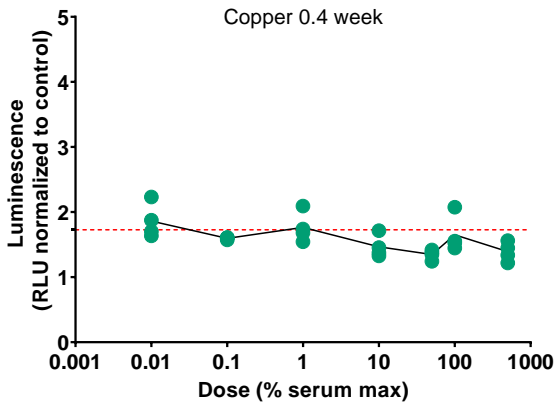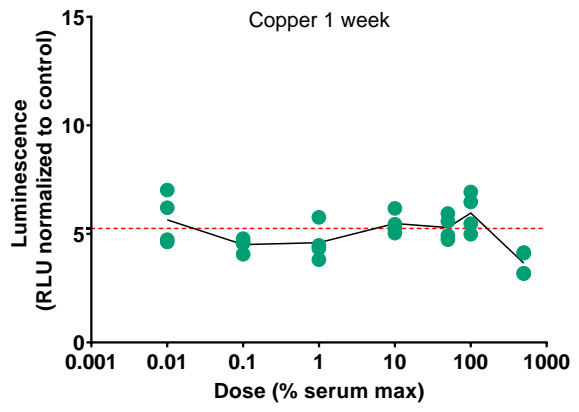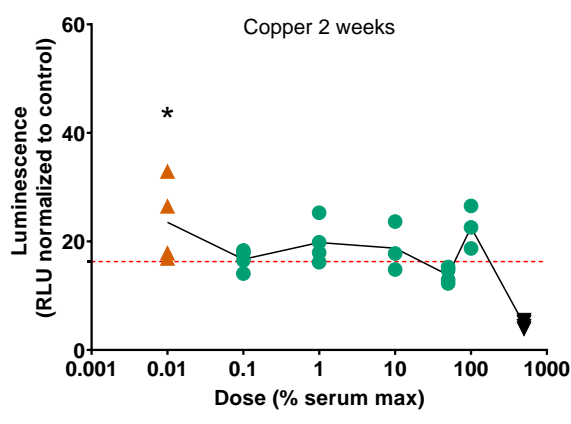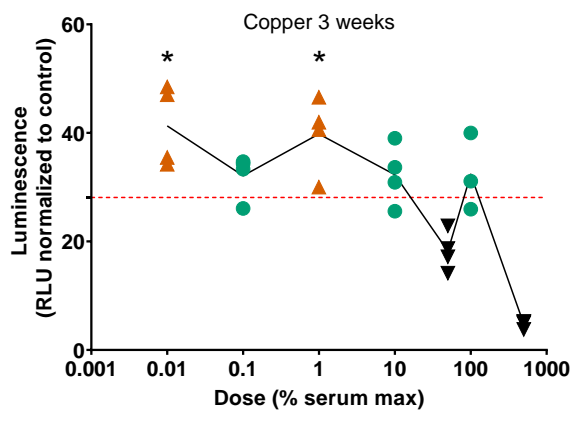

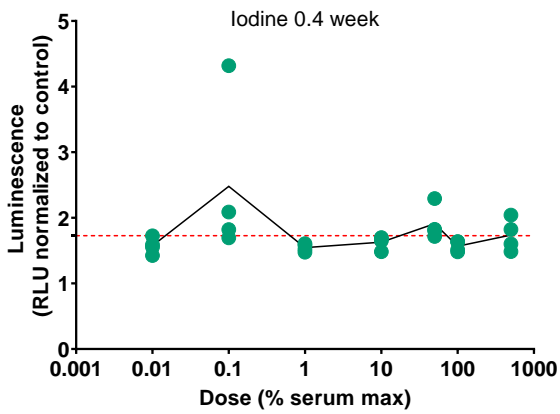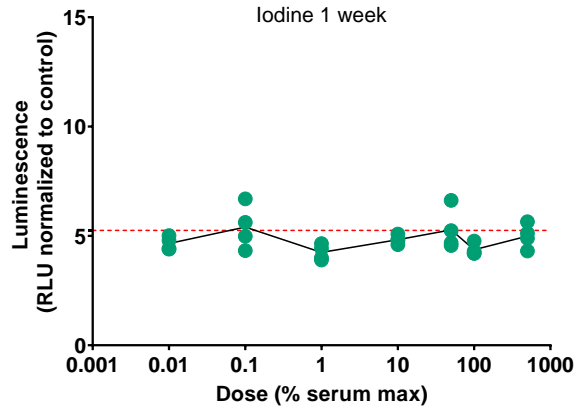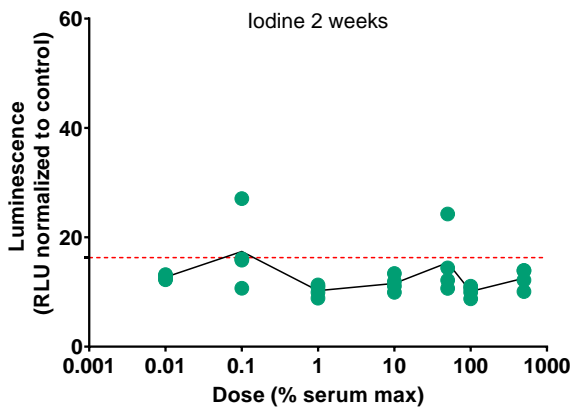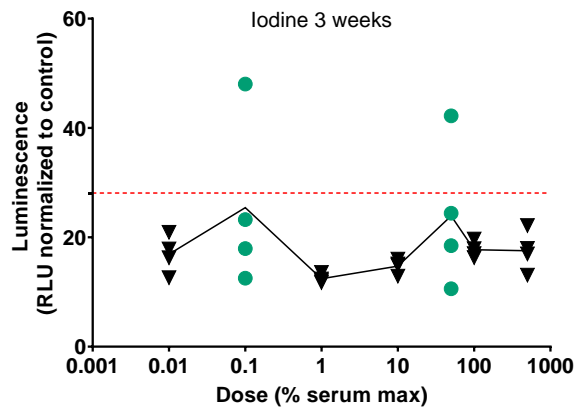

There was no significant interaction found between time and dose, both time ( $p < 0.0001$ ) and dose ( $p = 0.0007$ ) were significant sources of variation.

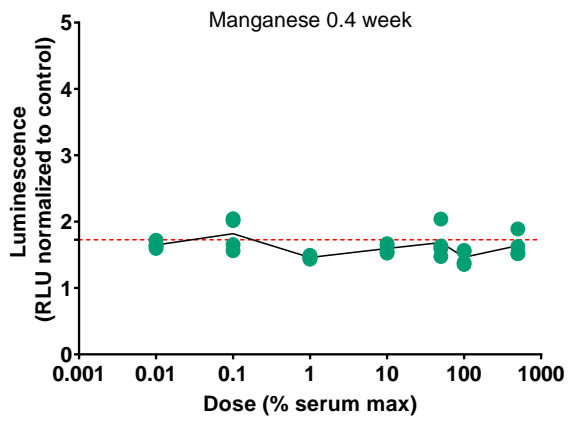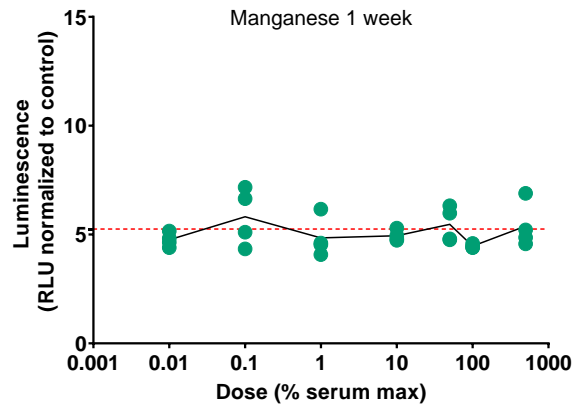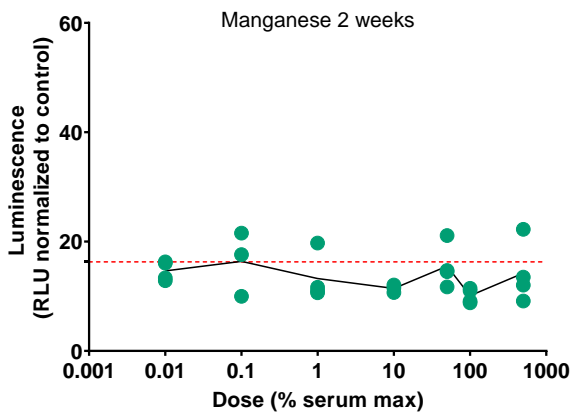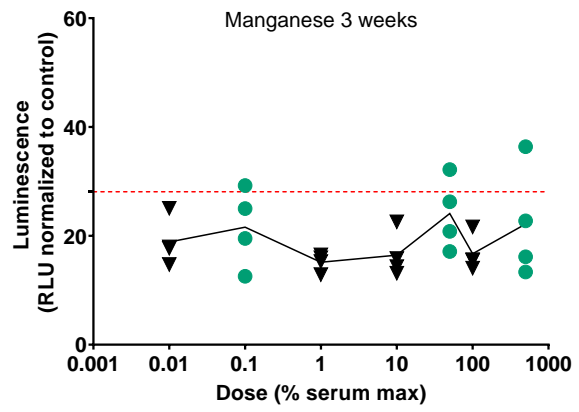

There was no significant interaction found between time and dose; both time ( $p < 0.0001$ ) and dose ( $p = 0.0024$ ) were significant sources of variation.

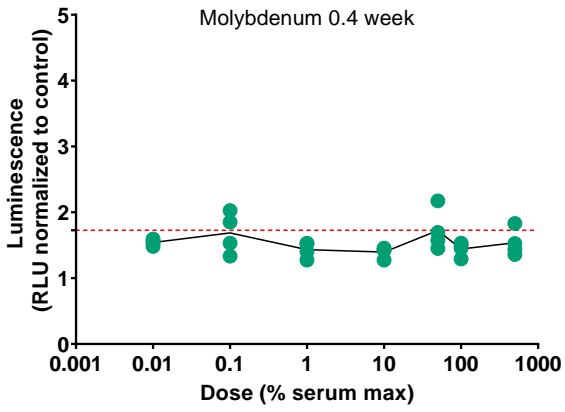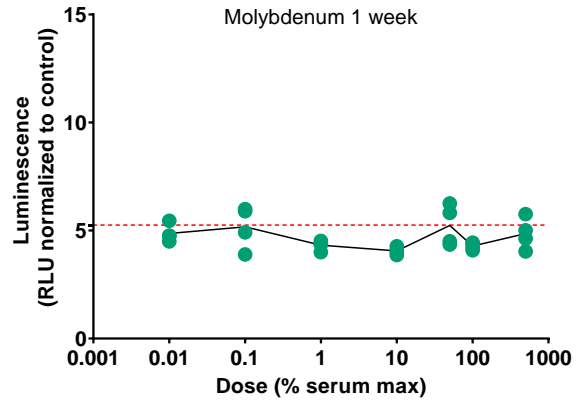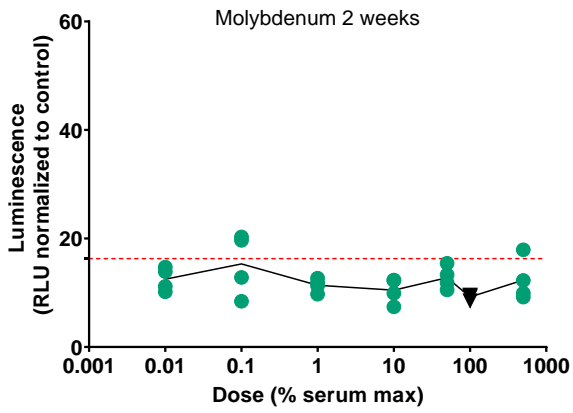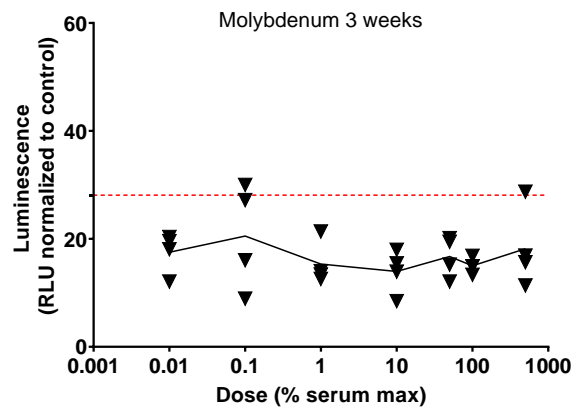

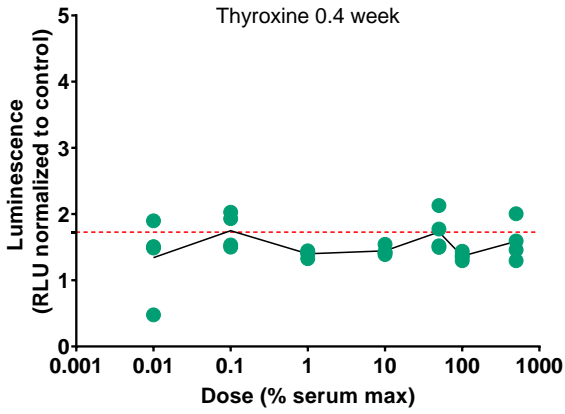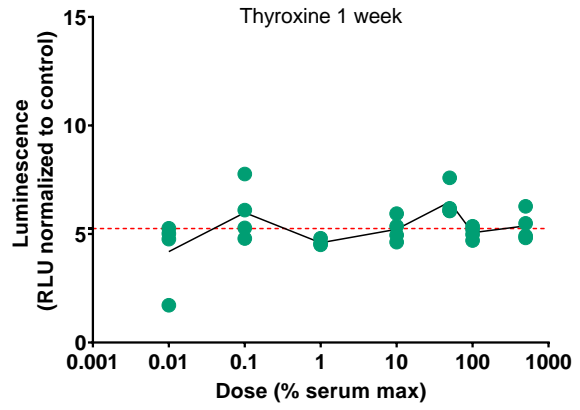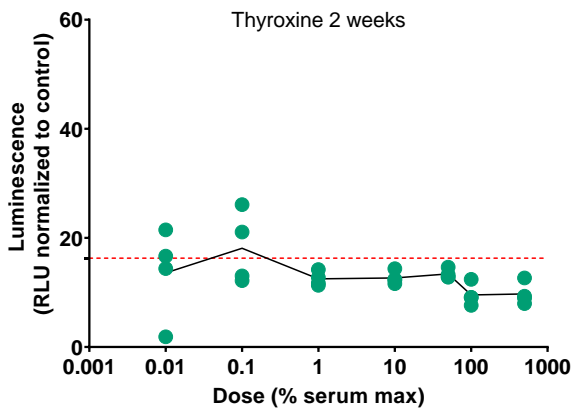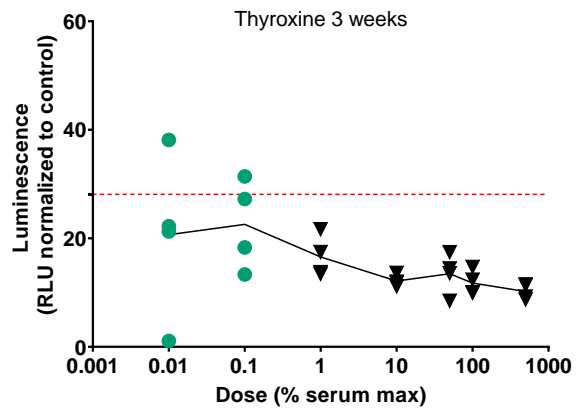

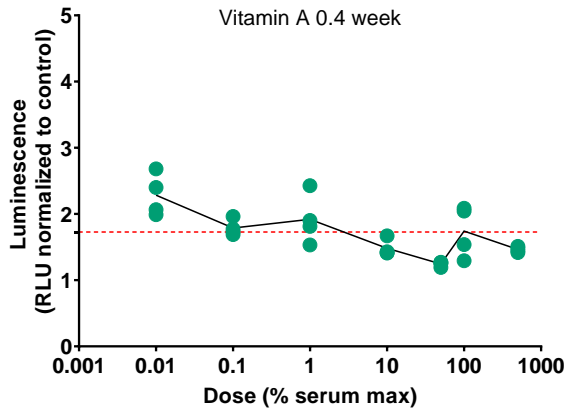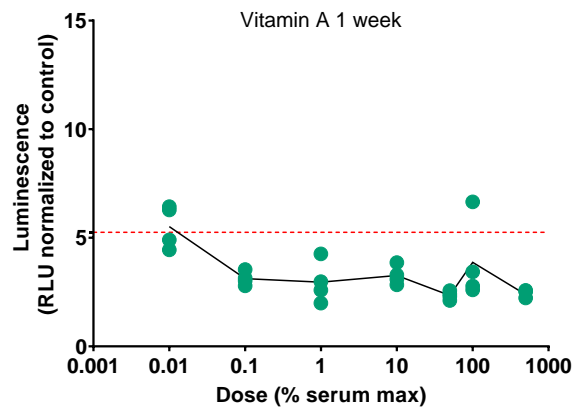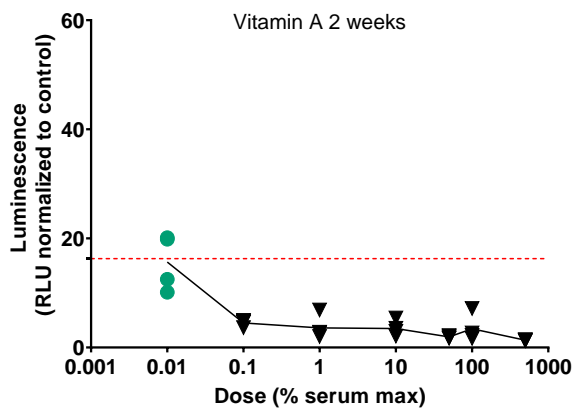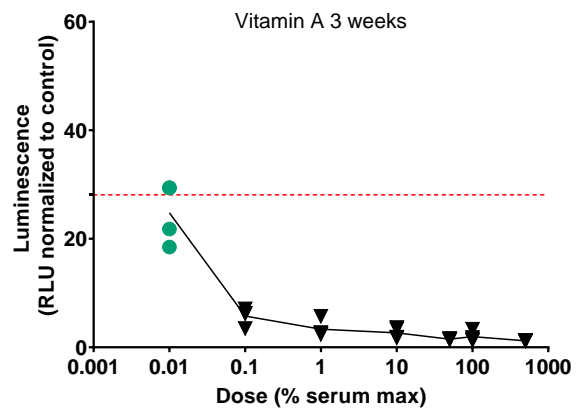

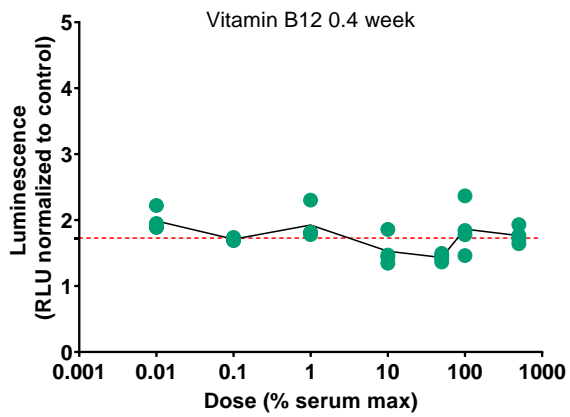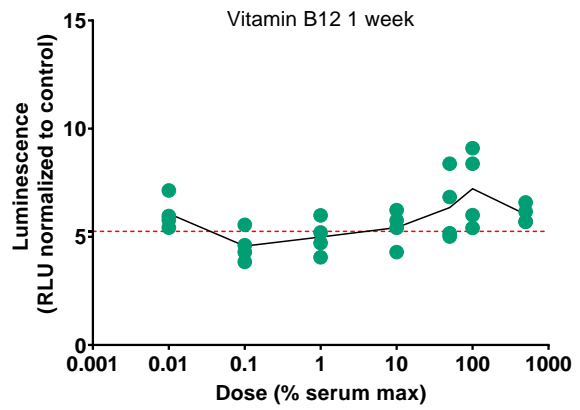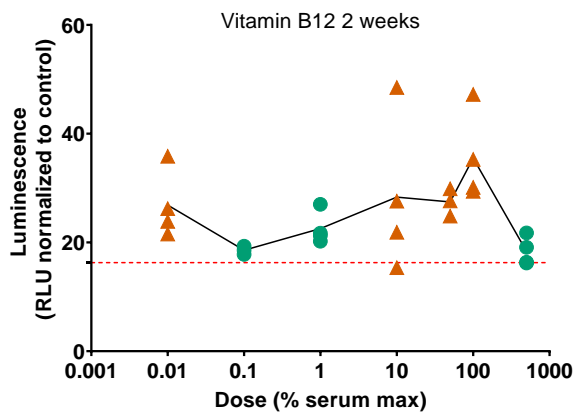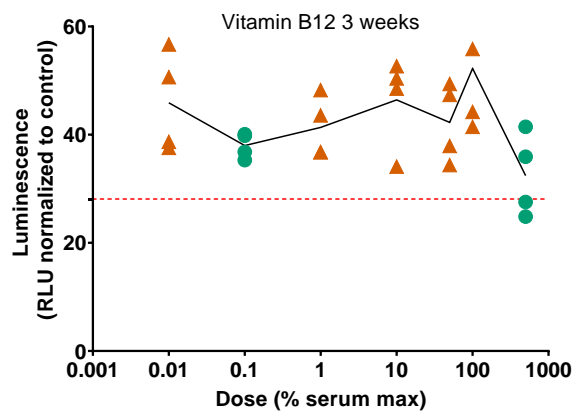

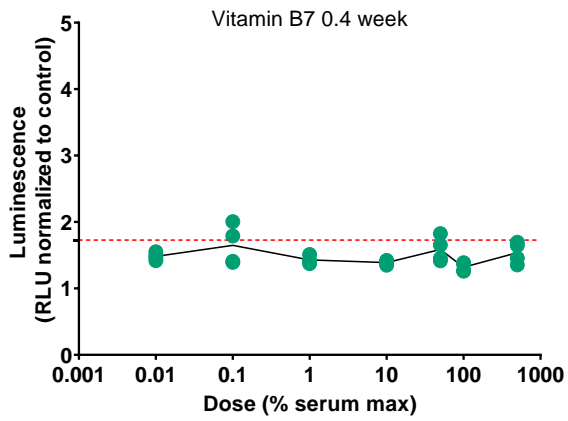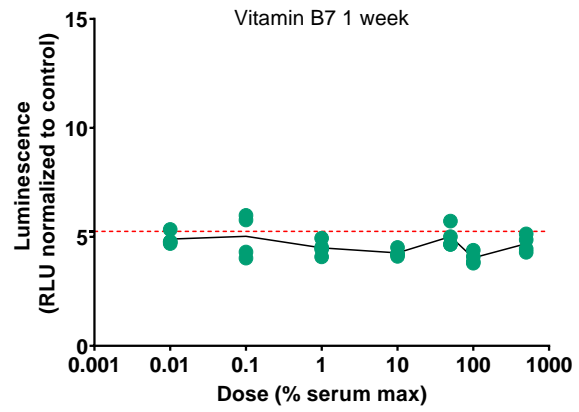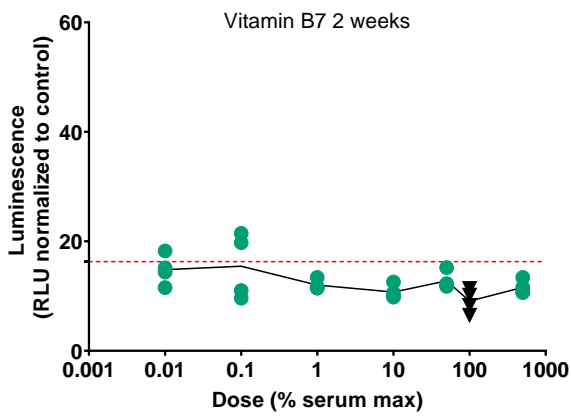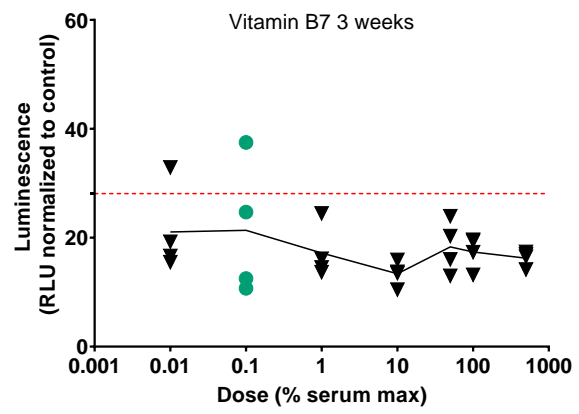

There was no significant interaction found between time and dose; both time ( $p < 0.0001$ ) and dose ( $p = 0.0005$ ) were significant sources of variation.



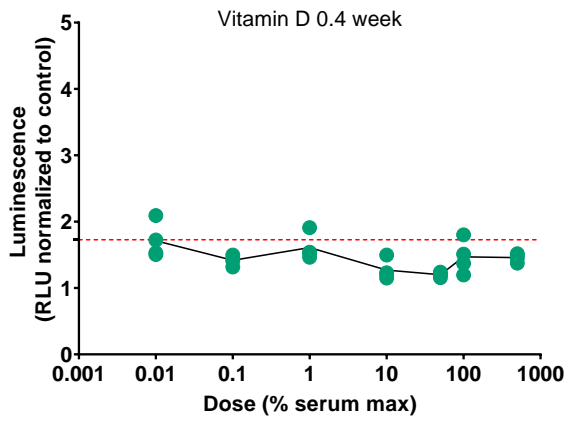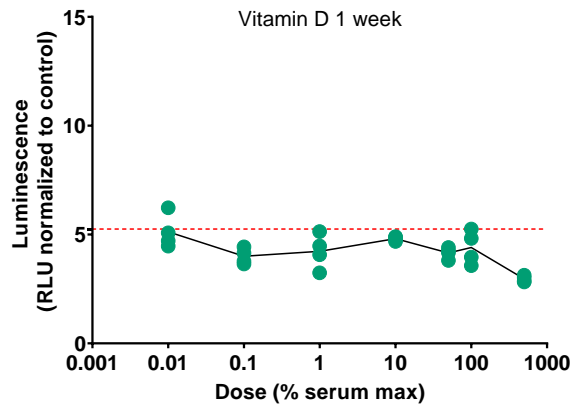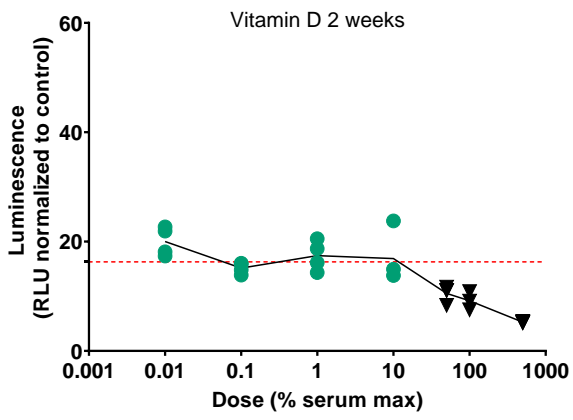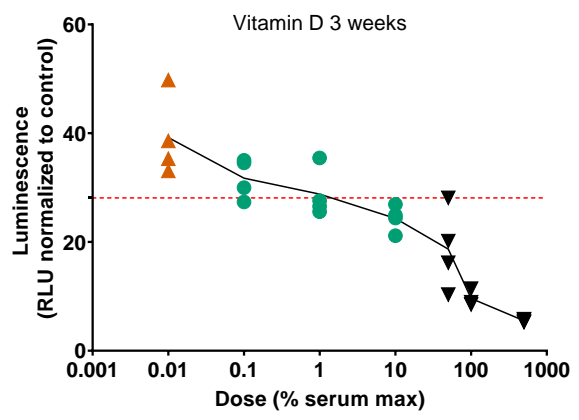

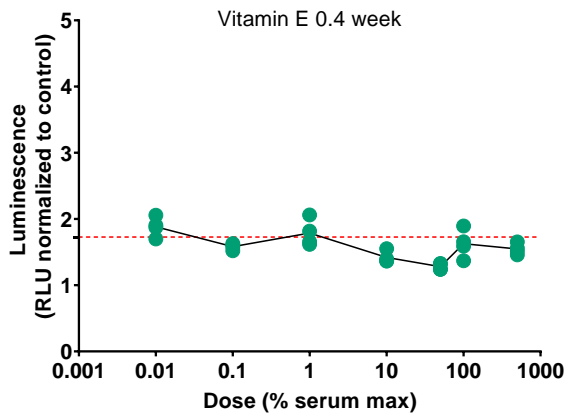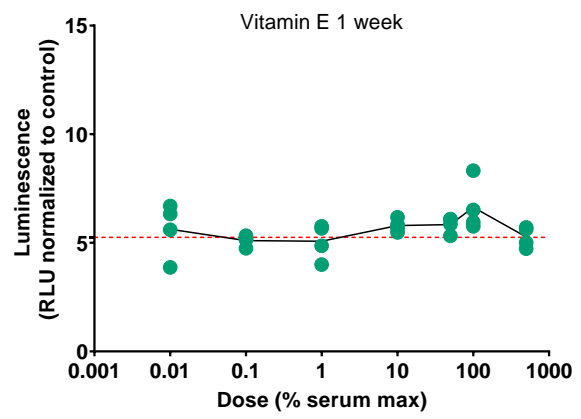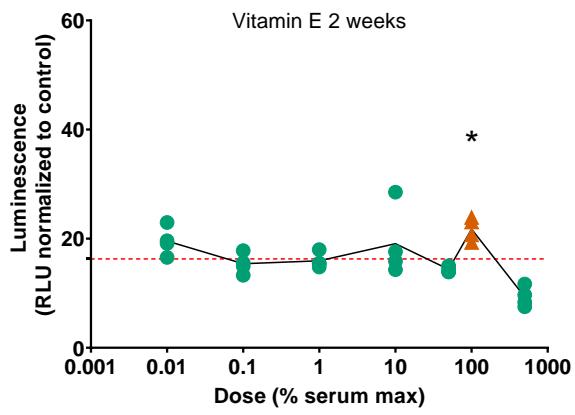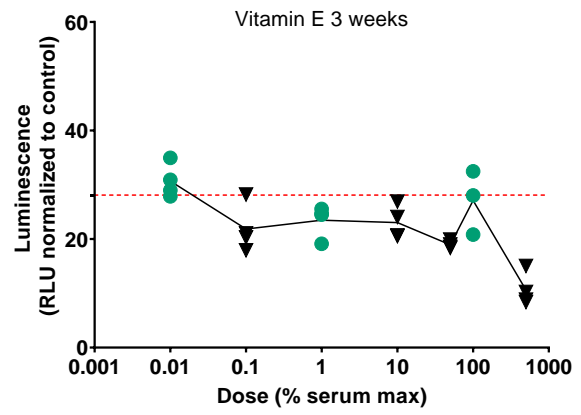

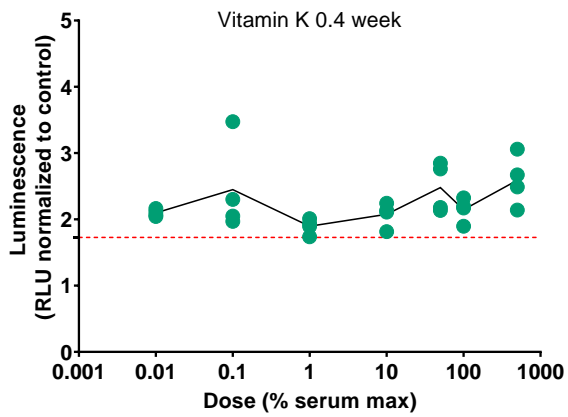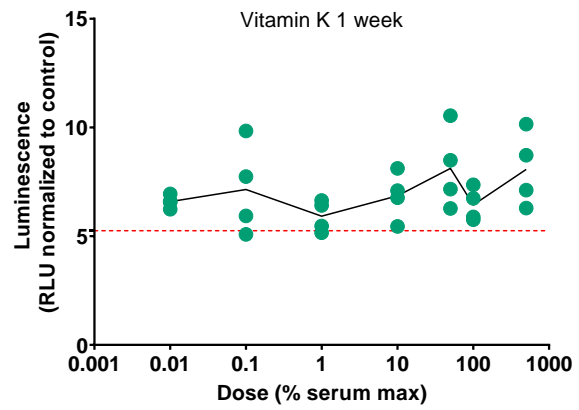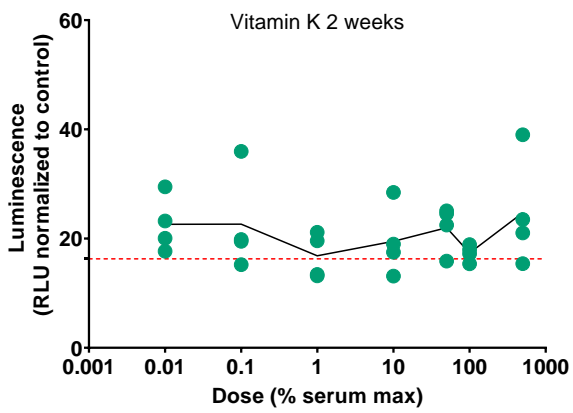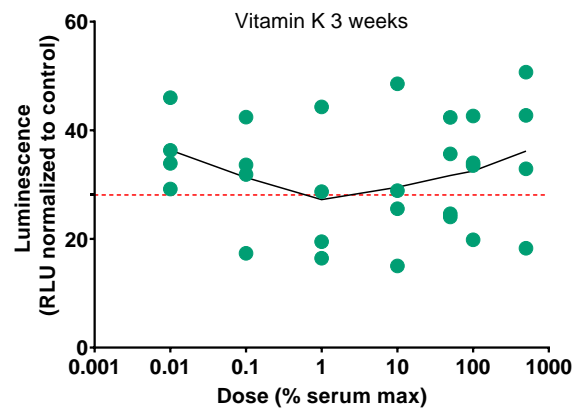

There was no significant interaction found between time and dose; only time ( $p < 0.0001$ ) was a significant source of variation.

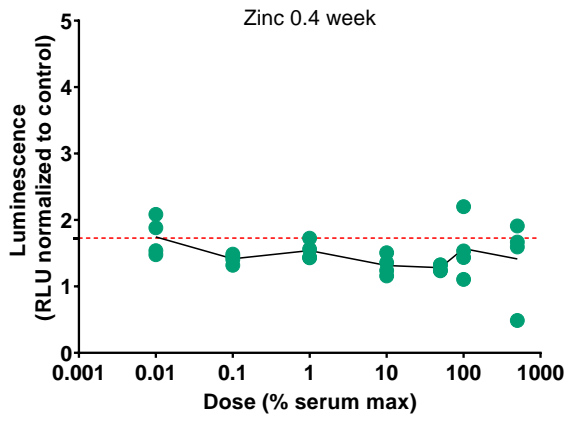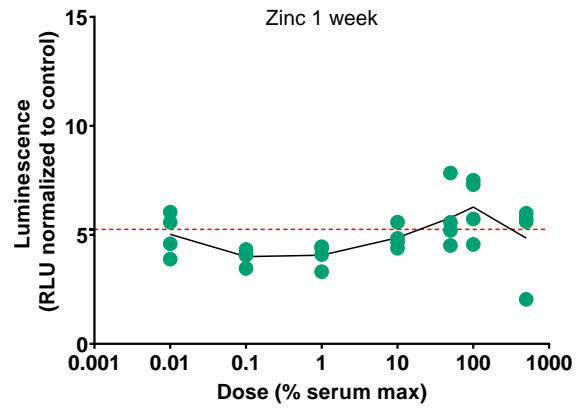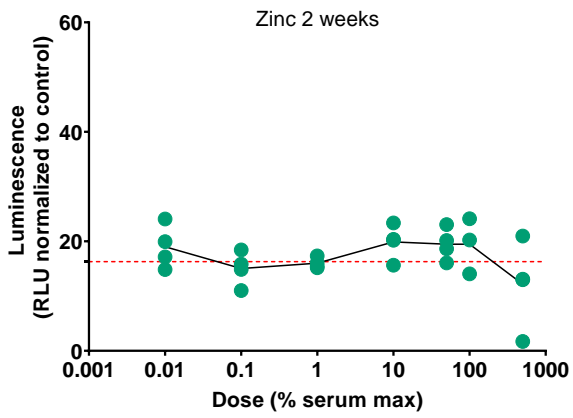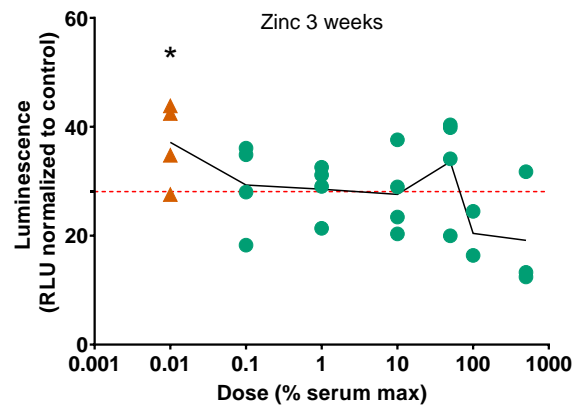

## Supplemental Data 6

The following graphs all show metabolic activity, assessed by resazurin fluorescence, at day 21 following continuous stimulation with vitamins or minerals in the presence of TGF $\beta$ 1 (1ng/ml) over a 5 log dose response. Conditions that were statistically greater than TGF $\beta$ 1 supplemented medium are represented by a  $\blacktriangle$  and an \*; conditions that were similar to TGF $\beta$ 1 supplemented medium are represented by a  $\bullet$ ; conditions that were lower than TGF $\beta$ 1 supplemented medium are represented by  $\blacktriangledown$ ; 1-way ANOVA with Dunnett's multiple comparison test, Alpha 0.05. A red dashed line indicates the mean TGF $\beta$ 1 supplemented medium response.

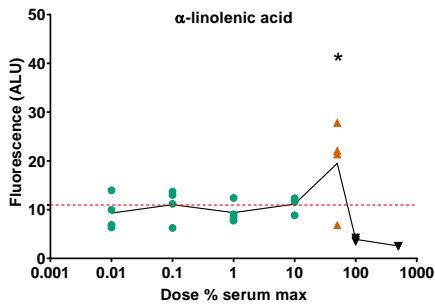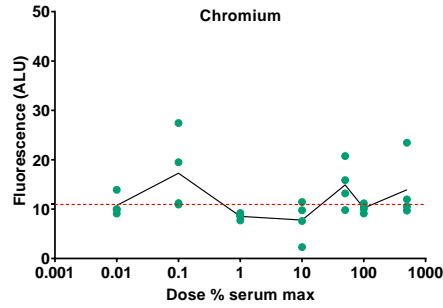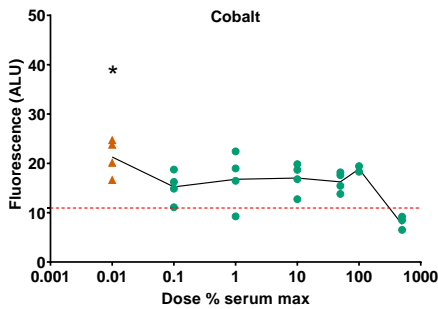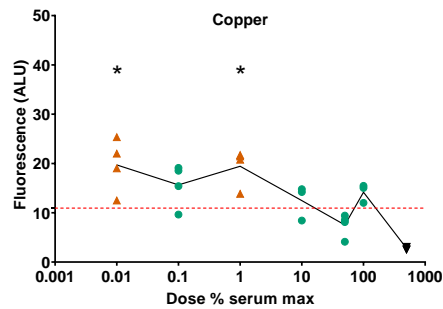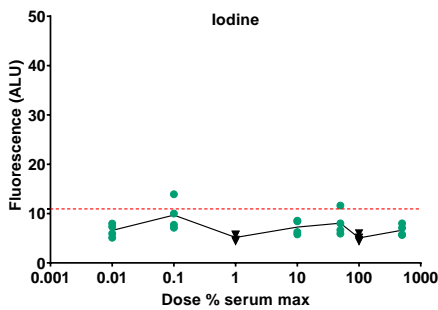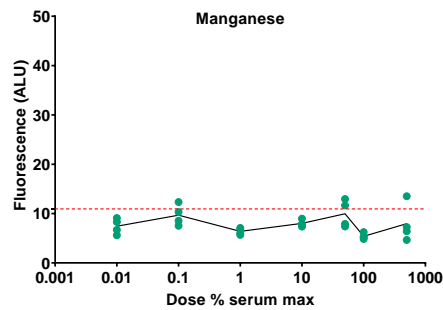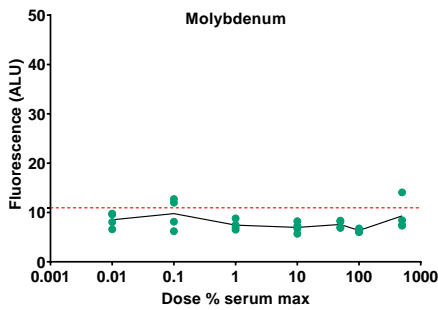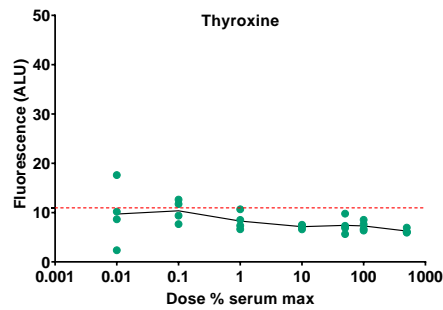

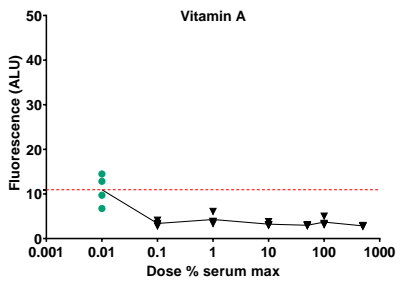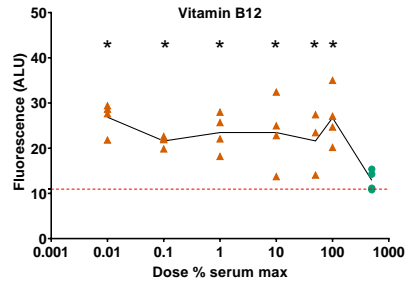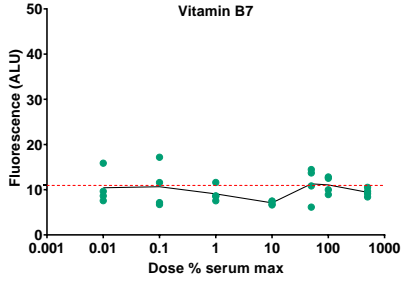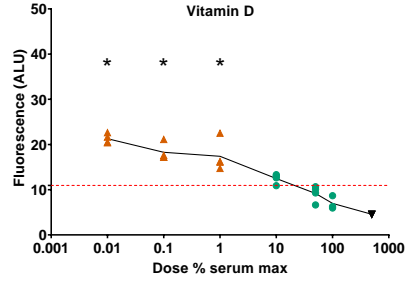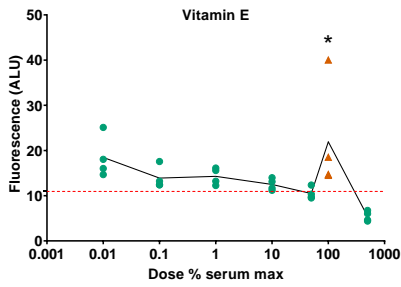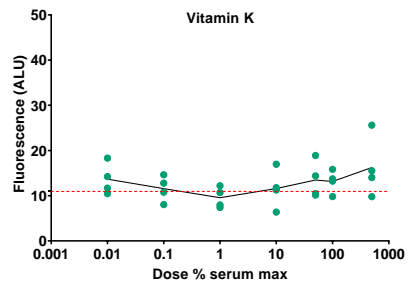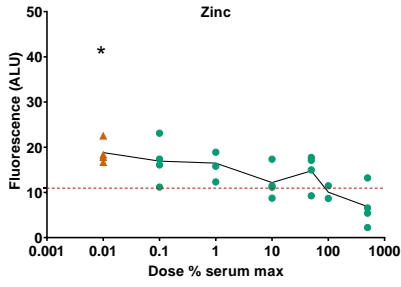

### Supplemental Data 7

The following table shows the cumulative response (normalized to basal medium control) to vitamin and mineral supplementation over the 21-day duration of the experiment in the presence of TGF $\beta$ 1 (1ng/ml), the table is sorted in order of the highest net area.

| Factor (dose % serum max)      | Net Area | Std. Error | 95% Confidence Interval |
|--------------------------------|----------|------------|-------------------------|
| Vitamin B12 (100)              | 434.3    | 55.07      | 326.4 to 542.3          |
| Chromium (0.1)                 | 369.1    | 84.07      | 204.3 to 533.9          |
| Vitamin B12 (10)               | 355.2    | 76.11      | 206.0 to 504.4          |
| Vitamin B12 (0.01)             | 348.2    | 42.19      | 265.5 to 430.9          |
| Vitamin B12 (50)               | 341.9    | 26.09      | 290.8 to 393.0          |
| $\alpha$ -linolenic acid (50)  | 323      | 111.3      | 104.9 to 541.2          |
| Vitamin K (500)                | 317.3    | 66.09      | 187.8 to 446.8          |
| Copper (0.01)                  | 308.1    | 44.43      | 221.0 to 395.2          |
| Chromium (50)                  | 303.8    | 69.33      | 167.9 to 439.7          |
| Vitamin B12 (1)                | 297.7    | 22.98      | 252.6 to 342.7          |
| Vitamin K (0.01)               | 293.1    | 33.25      | 227.9 to 358.2          |
| Cobalt (0.01)                  | 289.1    | 29.24      | 231.8 to 346.4          |
| Vitamin K (50)                 | 284.7    | 35.1       | 215.9 to 353.5          |
| Vitamin K (0.1)                | 282.2    | 56.15      | 172.1 to 392.2          |
| Copper (100)                   | 276.5    | 29.24      | 219.2 to 333.8          |
| Vitamin D (0.01)               | 273.9    | 26.17      | 222.6 to 325.2          |
| Cobalt (10)                    | 271.9    | 42.28      | 189.1 to 354.8          |
| Copper (1)                     | 271.2    | 29.04      | 214.2 to 328.1          |
| Zinc (0.01)                    | 260.2    | 30.43      | 200.6 to 319.8          |
| Vitamin E (100)                | 258.6    | 21.22      | 217.0 to 300.2          |
| Vitamin B12 (0.1)              | 256.8    | 8.326      | 240.5 to 273.1          |
| Zinc (50)                      | 256.4    | 32.63      | 192.4 to 320.3          |
| Vitamin K (10)                 | 252.4    | 53.2       | 148.2 to 356.7          |
| Vitamin E (0.01)               | 248.6    | 17.08      | 215.1 to 282.0          |
| Vitamin B12 (500)              | 247.6    | 26.48      | 195.7 to 299.5          |
| Copper (10)                    | 246      | 28.16      | 190.8 to 301.2          |
| Chromium (500)                 | 244.7    | 64.92      | 117.5 to 371.9          |
| Vitamin K (100)                | 244      | 29.41      | 186.4 to 301.6          |
| Cobalt (100)                   | 242.5    | 22.6       | 198.2 to 286.8          |
| $\alpha$ -linolenic acid (0.1) | 240.5    | 50.59      | 141.4 to 339.7          |
| Zinc (10)                      | 235.8    | 27.83      | 181.3 to 290.4          |
| Cobalt (50)                    | 233.2    | 16.94      | 200.0 to 266.4          |
| Copper (0.1)                   | 225.5    | 15.53      | 195.0 to 255.9          |
| Vitamin E (10)                 | 222.3    | 33.49      | 156.6 to 287.9          |
| Chromium (0.01)                | 221      | 33.23      | 155.9 to 286.2          |
| Vitamin K (1)                  | 220.9    | 43         | 136.6 to 305.2          |

|                         |       |       |                |
|-------------------------|-------|-------|----------------|
| Zinc (100)              | 220.4 | 31.27 | 159.1 to 281.7 |
| Vitamin D (1)           | 219   | 19.6  | 180.6 to 257.4 |
| Iodine (0.1)            | 217.6 | 58.59 | 102.8 to 332.4 |
| Thyroxine (0.1)         | 215.8 | 41.92 | 133.6 to 298.0 |
| BR + TGFβ1              | 215.4 | 25.49 | 165.4 to 265.3 |
| Vitamin D (0.1)         | 210.1 | 12.26 | 186.1 to 234.2 |
| Zinc (1)                | 207.1 | 15.94 | 175.9 to 238.4 |
| Vitamin D (10)          | 204.7 | 24.25 | 157.1 to 252.2 |
| Vitamin A (0.01)        | 203.5 | 30.72 | 143.3 to 263.7 |
| Zinc (0.1)              | 202   | 28.98 | 145.2 to 258.8 |
| Manganese (0.1)         | 200   | 36.97 | 127.5 to 272.4 |
| Manganese (50)          | 199   | 28.23 | 143.7 to 254.4 |
| Vitamin E (1)           | 198   | 11.83 | 174.8 to 221.1 |
| Cobalt (1)              | 197.1 | 36.02 | 126.5 to 267.7 |
| Iodine (50)             | 196.8 | 50.85 | 97.16 to 296.5 |
| α-linolenic acid (0.01) | 190.1 | 41.5  | 108.7 to 271.4 |
| Vitamin E (0.1)         | 189.2 | 16.26 | 157.3 to 221.0 |
| Vitamin B7 (0.1)        | 187.7 | 48.11 | 93.42 to 282.0 |
| α-linolenic acid (10)   | 186.2 | 10.96 | 164.8 to 207.7 |
| Molybdenum (0.1)        | 185.1 | 41.19 | 104.4 to 265.8 |
| α-linolenic acid (1)    | 185.1 | 15.99 | 153.8 to 216.5 |
| Manganese (500)         | 183.7 | 42.03 | 101.3 to 266.0 |
| Vitamin B7 (0.01)       | 181.3 | 27.8  | 126.8 to 235.8 |
| Chromium (100)          | 180.7 | 12.43 | 156.4 to 205.1 |
| Cobalt (0.1)            | 180.4 | 17.91 | 145.3 to 215.5 |
| Vitamin E (50)          | 177.2 | 3.812 | 169.7 to 184.7 |
| Manganese (0.01)        | 172.9 | 15.97 | 141.6 to 204.2 |
| Copper (50)             | 167.7 | 13.26 | 141.7 to 193.7 |
| Thyroxine (0.01)        | 167.1 | 62.27 | 45.00 to 289.1 |
| Chromium (1)            | 162.1 | 6.33  | 149.7 to 174.5 |
| Vitamin B7 (50)         | 159.6 | 16.71 | 126.9 to 192.4 |
| Thyroxine (50)          | 158.5 | 12.43 | 134.2 to 182.9 |
| Zinc (500)              | 156.7 | 52.09 | 54.57 to 258.7 |
| Molybdenum (50)         | 156.5 | 16.05 | 125.0 to 187.9 |
| Iodine (500)            | 155.7 | 14.64 | 127.0 to 184.4 |
| Chromium (10)           | 155.3 | 34.66 | 87.38 to 223.2 |
| Molybdenum (500)        | 155   | 29.99 | 96.24 to 213.8 |
| Molybdenum (0.01)       | 154.2 | 15.7  | 123.5 to 185.0 |
| Iodine (0.01)           | 152.8 | 10.71 | 131.8 to 173.8 |
| Cobalt (500)            | 152.7 | 12.46 | 128.3 to 177.1 |
| Manganese (1)           | 152.2 | 22.58 | 108.0 to 196.5 |
| Thyroxine (1)           | 149.6 | 13.24 | 123.6 to 175.5 |
| Vitamin B7 (1)          | 147.5 | 15.61 | 116.9 to 178.1 |



|                                |        |        |                  |
|--------------------------------|--------|--------|------------------|
| Manganese (10)                 | 144.3  | 13.18  | 118.5 to 170.2   |
| Vitamin B7 (500)               | 143.1  | 7.943  | 127.5 to 158.6   |
| Thyroxine (10)                 | 141.2  | 7.162  | 127.2 to 155.2   |
| Iodine (10)                    | 139.5  | 8.329  | 123.2 to 155.8   |
| Vitamin D (50)                 | 139.1  | 23.62  | 92.79 to 185.4   |
| Molybdenum (1)                 | 136.5  | 13.72  | 109.6 to 163.4   |
| Iodine (100)                   | 135.2  | 6.792  | 121.9 to 148.5   |
| Manganese (100)                | 132.5  | 12.14  | 108.7 to 156.3   |
| Vitamin B7 (10)                | 125.7  | 9.282  | 107.5 to 143.9   |
| Vitamin B7 (100)               | 124.6  | 14.03  | 97.15 to 152.2   |
| Molybdenum (10)                | 124.4  | 16.84  | 91.35 to 157.4   |
| Molybdenum (100)               | 120.1  | 4.995  | 110.3 to 129.9   |
| Iodine (1)                     | 119.6  | 6.093  | 107.7 to 131.5   |
| Thyroxine (100)                | 117.3  | 12.23  | 93.30 to 141.2   |
| Thyroxine (500)                | 116.2  | 11.47  | 93.67 to 138.6   |
| Vitamin E (500)                | 113.8  | 13.05  | 88.21 to 139.4   |
| Vitamin D (100)                | 104.3  | 10.17  | 84.41 to 124.3   |
| Vitamin D (500)                | 56.04  | 1.154  | 53.78 to 58.30   |
| Copper (500)                   | 54.15  | 4.816  | 44.71 to 63.59   |
| Vitamin A (0.1)                | 53.1   | 5.784  | 41.76 to 64.44   |
| Vitamin A (1)                  | 38.77  | 12.79  | 13.70 to 63.84   |
| $\alpha$ -linolenic acid (100) | 38.66  | 1.248  | 36.22 to 41.11   |
| Vitamin A (100)                | 38.49  | 15.45  | 8.204 to 68.78   |
| Vitamin A (10)                 | 36.95  | 7.876  | 21.51 to 52.38   |
| Vitamin A (50)                 | 16.57  | 1.479  | 13.67 to 19.46   |
| Vitamin A (500)                | 12.13  | 0.9688 | 10.23 to 14.03   |
| $\alpha$ -linolenic acid (500) | -14.43 | 0.5707 | -15.55 to -13.31 |

### Supplemental Data 8

The effect of vitamins and minerals on *Gaussia* luciferase luminescence was assessed by supplementation of conditioned medium with each of the vitamins and minerals tested. No significant changes were seen.

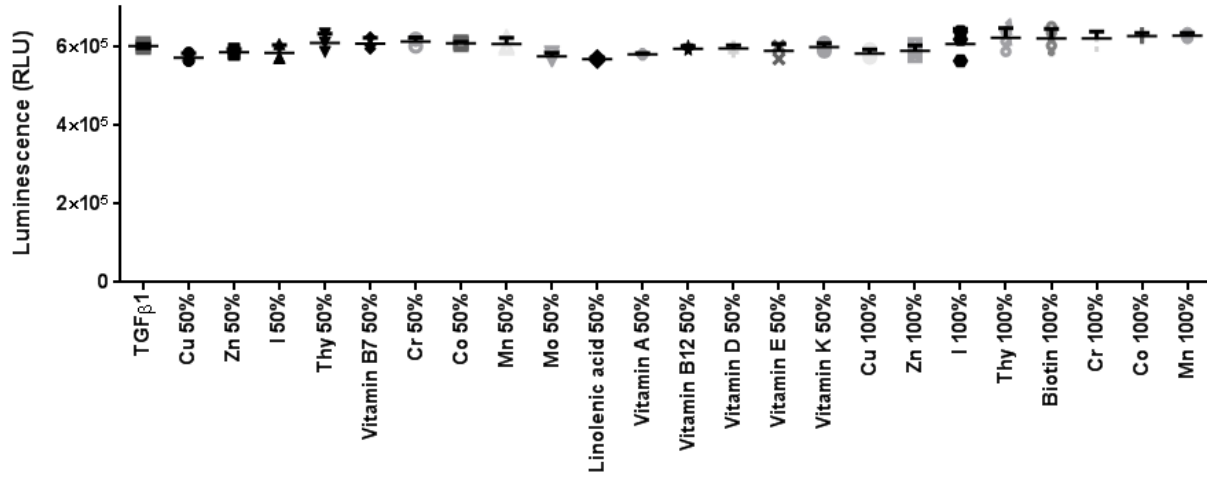

## Supplemental Data 9

Plasmid maps for col2gluc (HPRM22364-LvPG02; Genecopoeia), the eGFP control (EX-EGFP-Lv105; GeneCopoeia), psPAX2 (plasmid # 12259; Addgene) and pMD2.G (plasmid # 12260; Addgene).

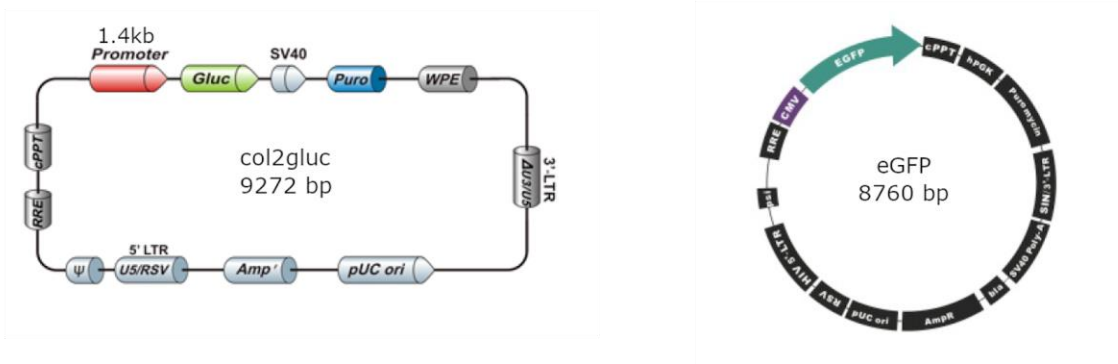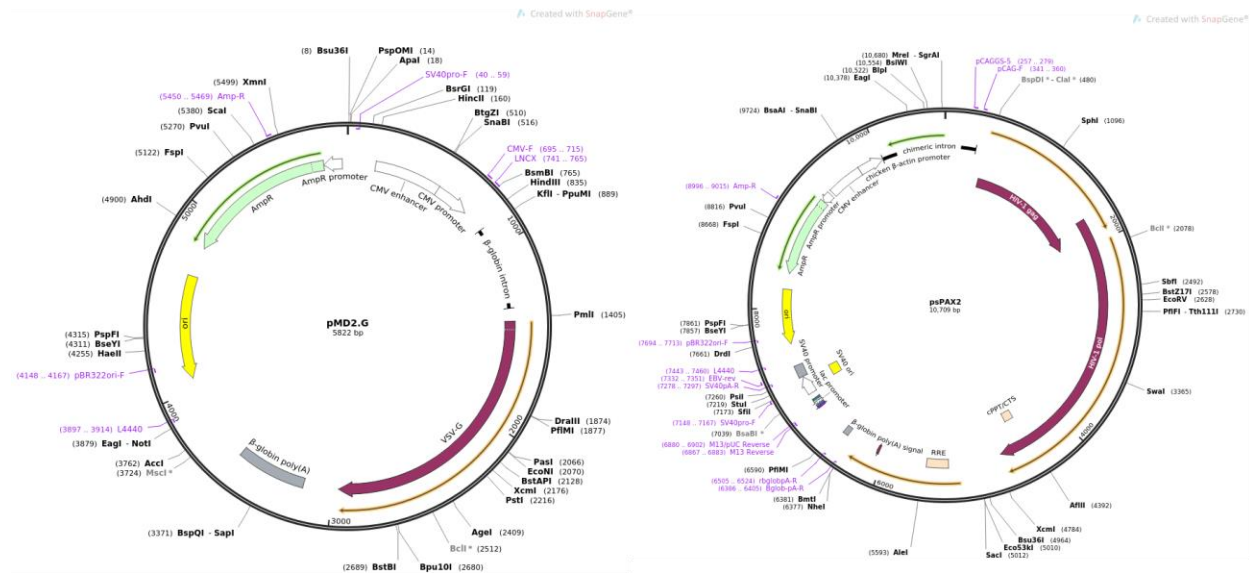

## Supplemental Data 10

The following graphs all show type II collagen promoter-driven luciferase activity normalized to metabolic activity. Assessment was performed at day 21 following continuous stimulation with vitamins or minerals in the presence of TGF $\beta$ 1 (1ng/ml) over a 5 log dose response. Conditions that were statistically greater than TGF $\beta$ 1 supplemented medium are represented by a  $\blacktriangle$  and an \*; conditions that were similar to TGF $\beta$ 1 supplemented medium are represented by a  $\bullet$ ; conditions that were lower than TGF $\beta$ 1 supplemented medium are represented by  $\blacktriangledown$ ; 2-way ANOVA with Dunnett's multiple comparison test, Alpha 0.05. A red dashed line indicates the mean TGF $\beta$ 1 supplemented medium response.

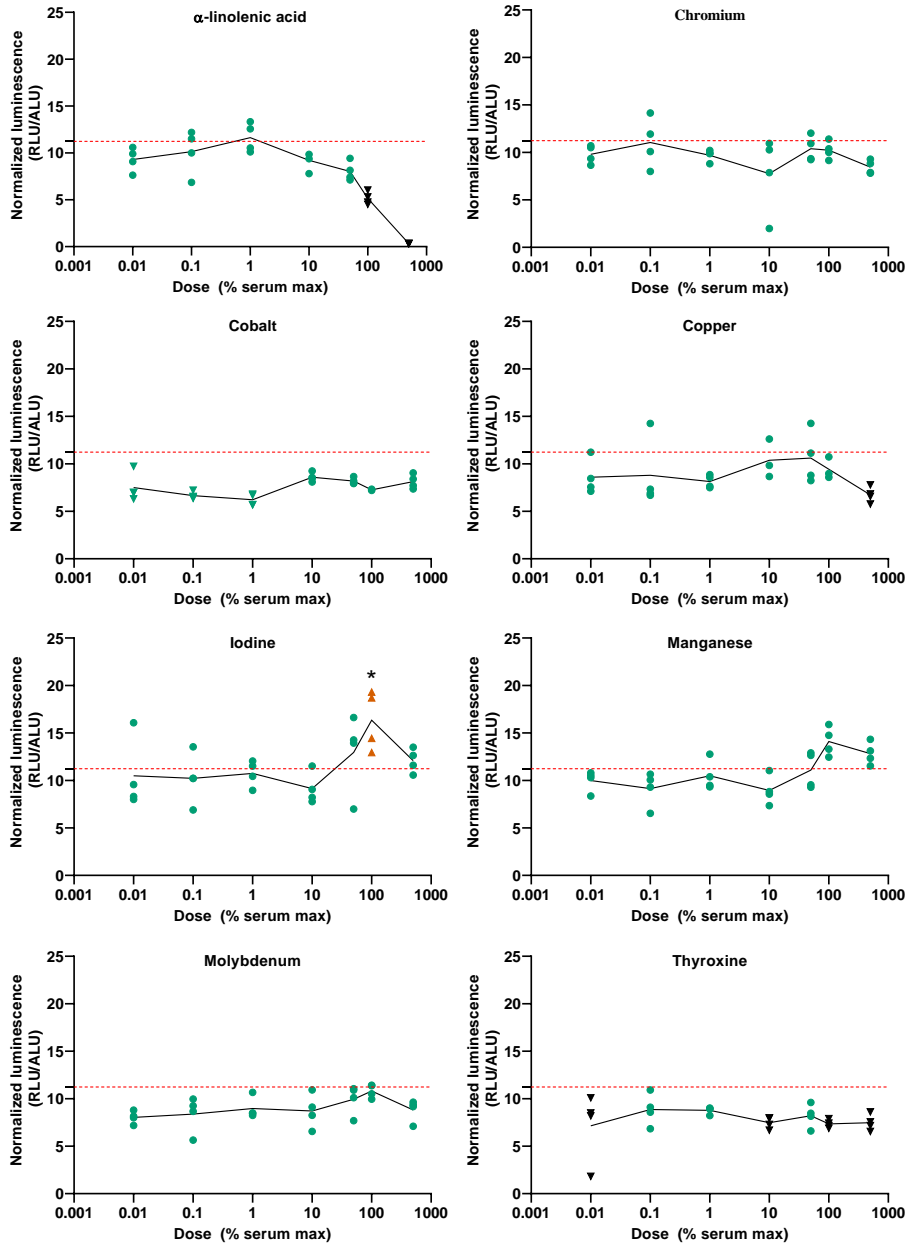

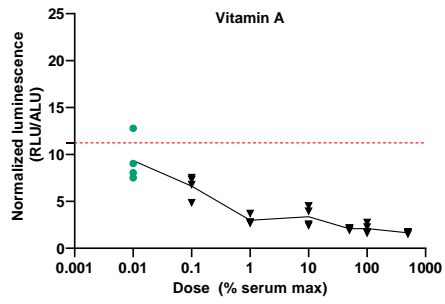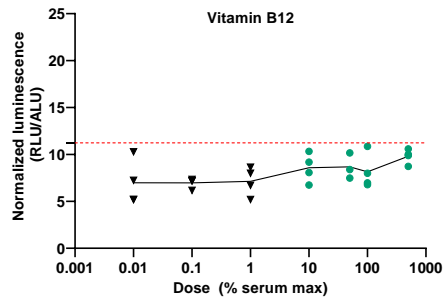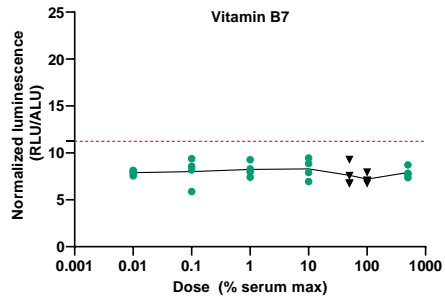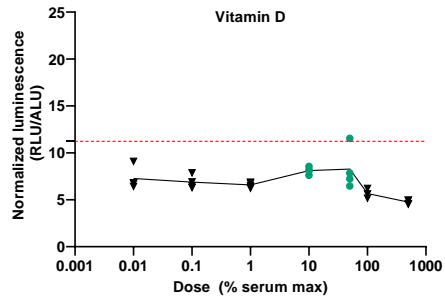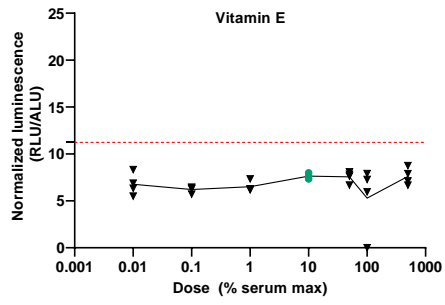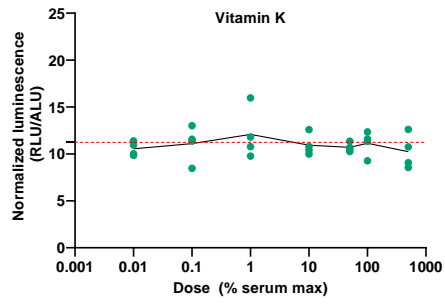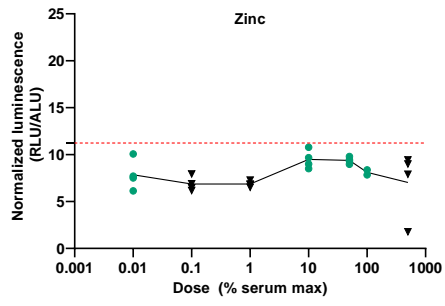

Supplement: Data_Sheet_1.pdf [file Data_Sheet_1.pdf]
